# Supplementary material for: Redox-active tin(ii) complexes with sterically demanding o-phenylenediamido ligands and their reactivity with organic azides
Source: Royal Society of Chemistry journal article supplement (doi:10.1039/d5dt00100e), 2025-01-01
Supplement: d5dt00100e1.pdf [file d5dt00100e1.pdf]

## Supplementary Information

### Redox Active Tin(II) Complexes with Sterically Demanding *o*-Phenylenediamido Ligands and their Reactivity with Organic Azides

Hideki Sugimoto,<sup>\*</sup> <sup>a</sup>Akira Yoneda,<sup>a</sup> Mayuka Yano,<sup>a</sup> Kazunobu Sato,<sup>\*</sup> <sup>b</sup> Yoshihito Shiota,<sup>c</sup> Mayuko Miyanishi,<sup>c</sup> Kazunari Yoshizawa<sup>\*</sup> <sup>c</sup> and Shinobu Itoh<sup>\*,a</sup>

[<sup>a</sup>] *Department of Material and Life Science, Division of Advanced Science and Biotechnology, Graduate School of Engineering, Osaka University, 2-1 Yamadaoka, Suita, Osaka 565-0871, Japan*

[<sup>b</sup>] *Department of Chemistry, Graduate School of Science, Osaka Metropolitan University, 3-3-138 Sumiyoshi, Osaka 555-8585, Japan*

[<sup>c</sup>] *Institute for Materials Chemistry and Engineering and International Research Center for Molecular System, Kyushu University, 744 Motoooka, Nishi-ku, Fukuoka, 819-0395, Japan*

<sup>\*</sup> Corresponding Author, E-mail: sugimoto@chem.eng.osaka-u.ac.jp, sato@omu.ac.jp, kazunari@ms.ifoc.kyushu-u.ac.jp, shinobu@chem.eng.osaka-u.ac.jp

## Contents:

- Page S3: *Figure S1*.  $^1\text{H}$  and  $^{13}\text{C}$  NMR spectra of  $^{\text{Cl}}\text{LH}_2$ .
- Page S4: *Figure S2*.  $^1\text{H}$  and  $^{13}\text{C}$  NMR spectra of  $^{\text{Me}}\text{LH}_2$ .
- Page S5: *Figure S3*.  $^1\text{H}$  and  $^{13}\text{C}$  NMR spectra of  $^{\text{OMe}}\text{LH}_2$ .
- Page S6: *Figure S4*.  $^1\text{H}$  and  $^{13}\text{C}$  NMR spectra of  $^{\text{naph}}\text{LH}_2$ .
- Page S7: *Figure S5*.  $^{119}\text{Sn}$ -NMR spectra
- Page S8: *Figure S6*. Absorption spectra of  $2^{\text{R}'}\text{-N}^\bullet$  measured at  $-30\text{ }^\circ\text{C}$ .
- Page S9: *Figure S7*. Stepwise spectral changes from  $\text{H}_1$ ,  $\text{H}_1^{\text{N}_3\text{-TolCF}_3}$ , and to  $\text{H}_2^{\text{TolCF}_3\text{-N}^\bullet}$ .
- Page S10: *Figure S8*. Time course plots at various concentrations of  $\text{N}_3\text{-TolCF}_3$ .
- Page S11: *Figure S9*. Absorption spectral change from  $^{\text{OMe}}\mathbf{1}$  to  $^{\text{OMe}}\mathbf{2}^{\text{TolCF}_3\text{-N}^\bullet}$ .
- Page S12: *Figure S10*. LUMO of  $\text{H}_1$ .
- Page S13: *Figure S11*. Temperature dependence of signal intensity at  $g = 4.002$  for  $\text{H}_2^{\text{TolCF}_3\text{-N}^\bullet}$ .
- Page S14: *Table S1*. Crystallographic data of  $^{\text{Cl}}\mathbf{1}$  and  $^{\text{Me}}\mathbf{1}$ .
- Page S15: *Table S2*. Crystallographic data of  $^{\text{OMe}}\mathbf{1}$ ,  $^{\text{naph}}\mathbf{1}$  and  $\text{SnL}^{\text{Bu}_2\text{Ph}}$ .
- Page S16: *Table S3*. Combination of  $\text{R}_1$  and  $\text{N}_3\text{-R}'$  that generates tin(II) nitrene radical complex
- Pages S17-S46: *Tables S4 – S9*. Cartesian coordinates of optimized structures.

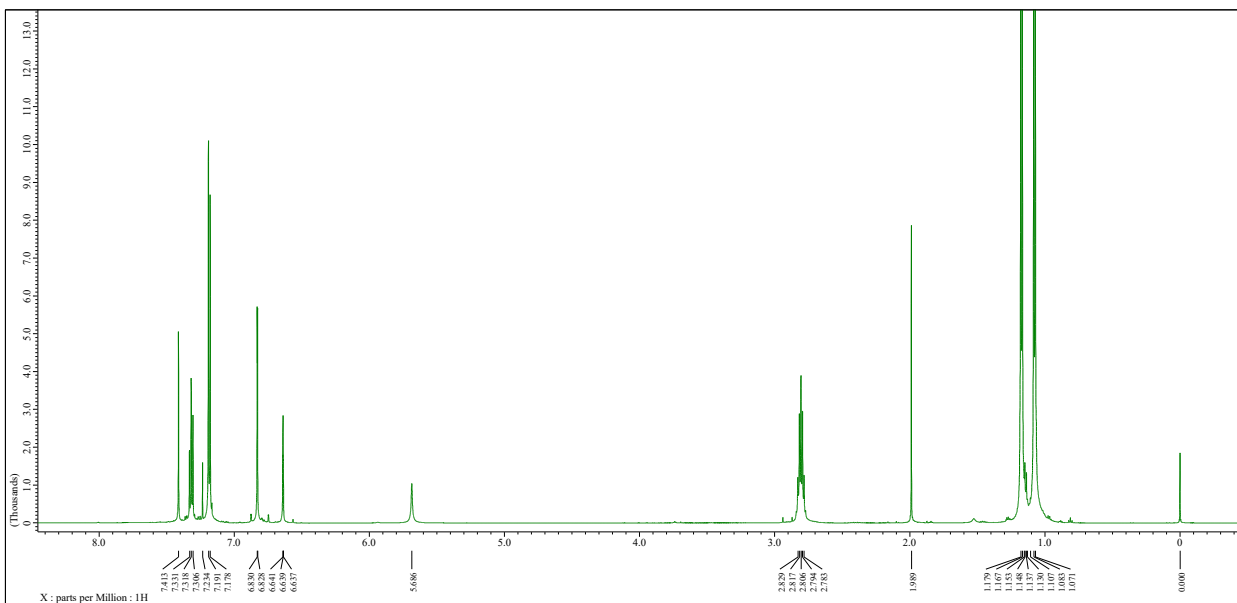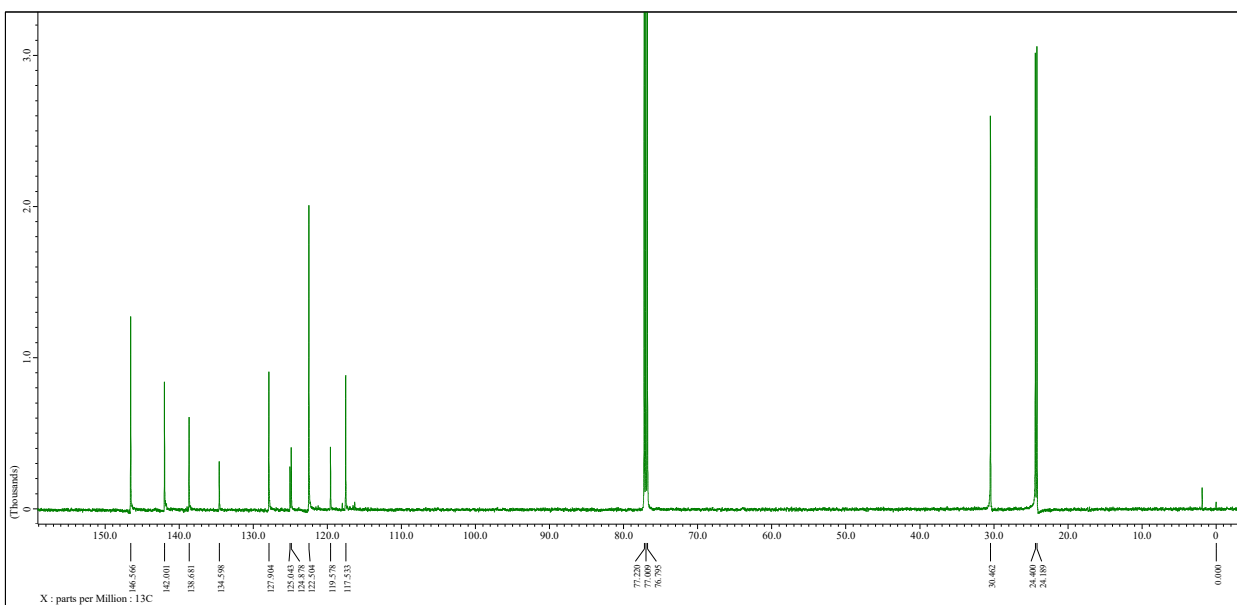

**Figure S1.**  $^1\text{H}$  and  $^{13}\text{C}$  NMR spectra of  $^{\text{Cl}}\text{LH}_2$ .

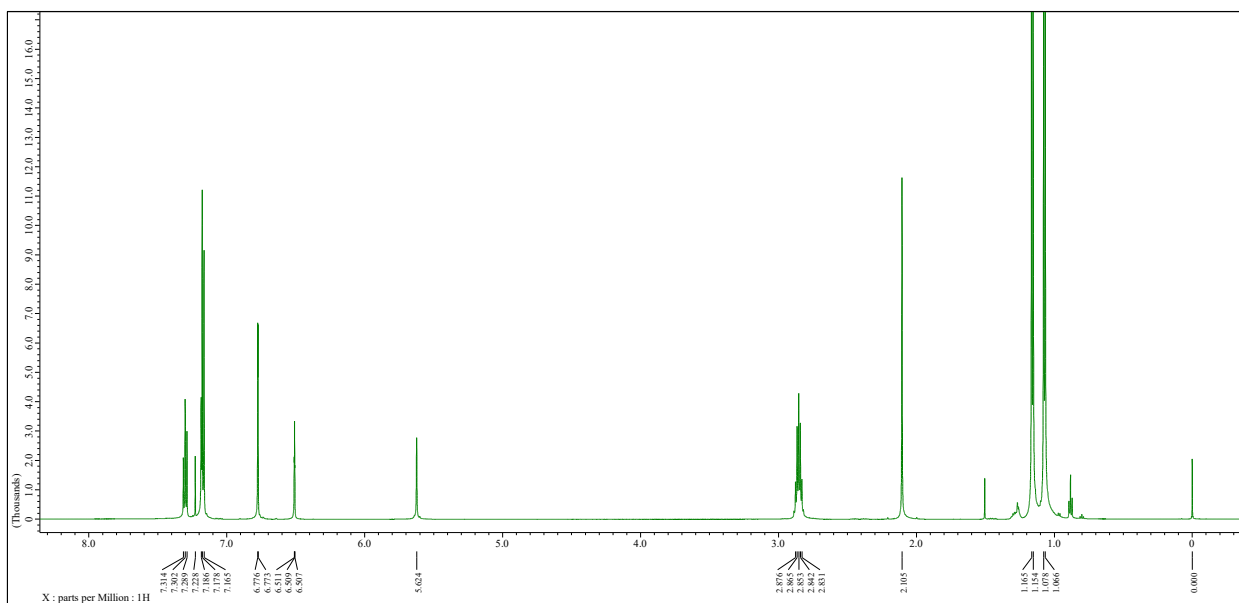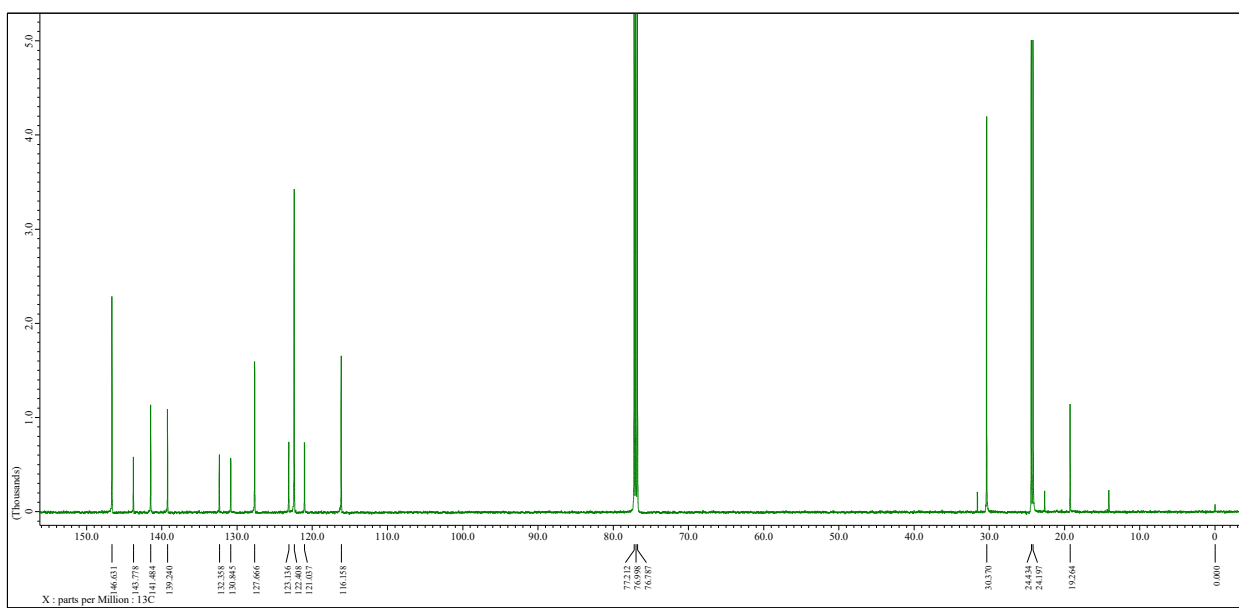

**Figure S2.** <sup>1</sup>H and <sup>13</sup>C NMR spectra of MeLH<sub>2</sub>.

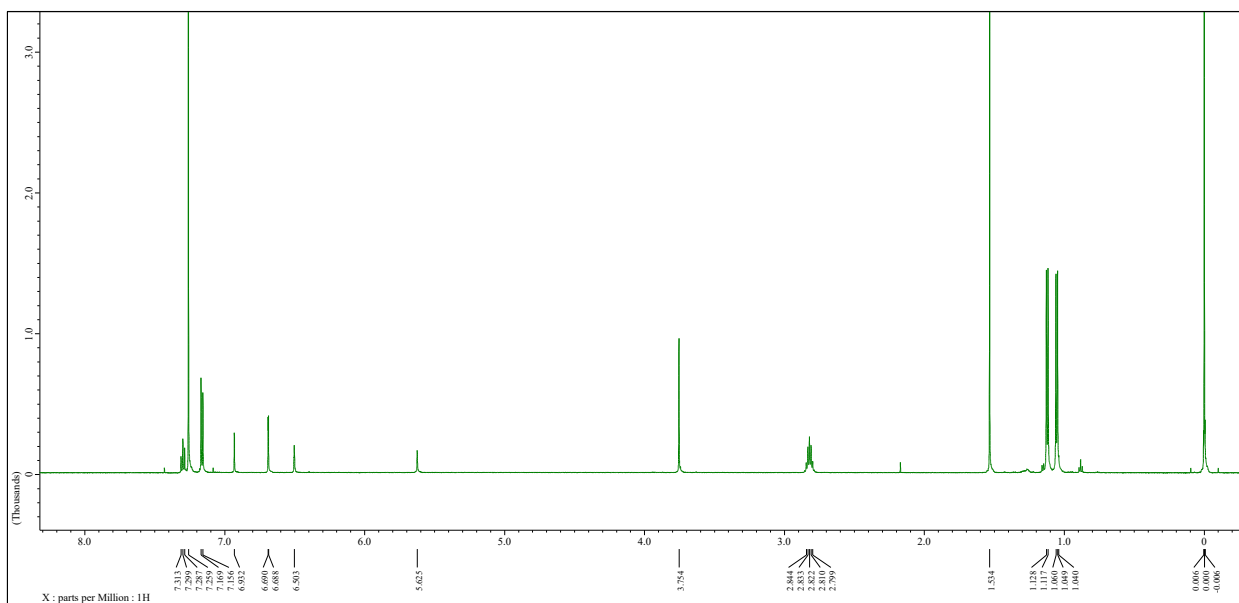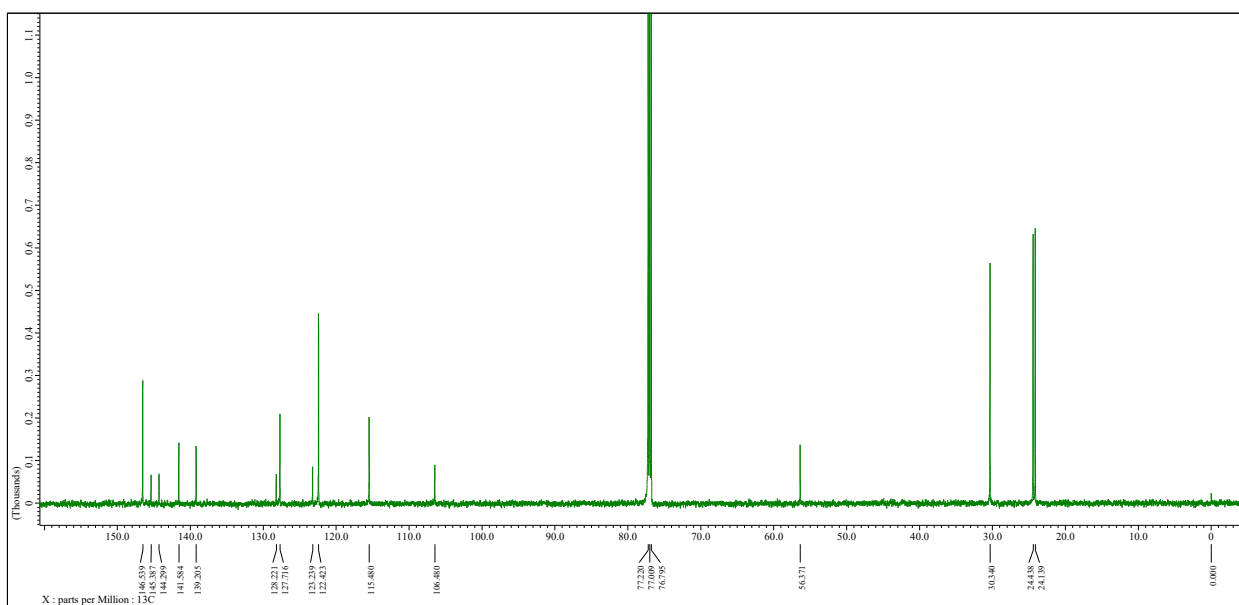

Figure S3.  $^1H$  and  $^{13}C$  NMR spectra of  $OMeLH_2$ .



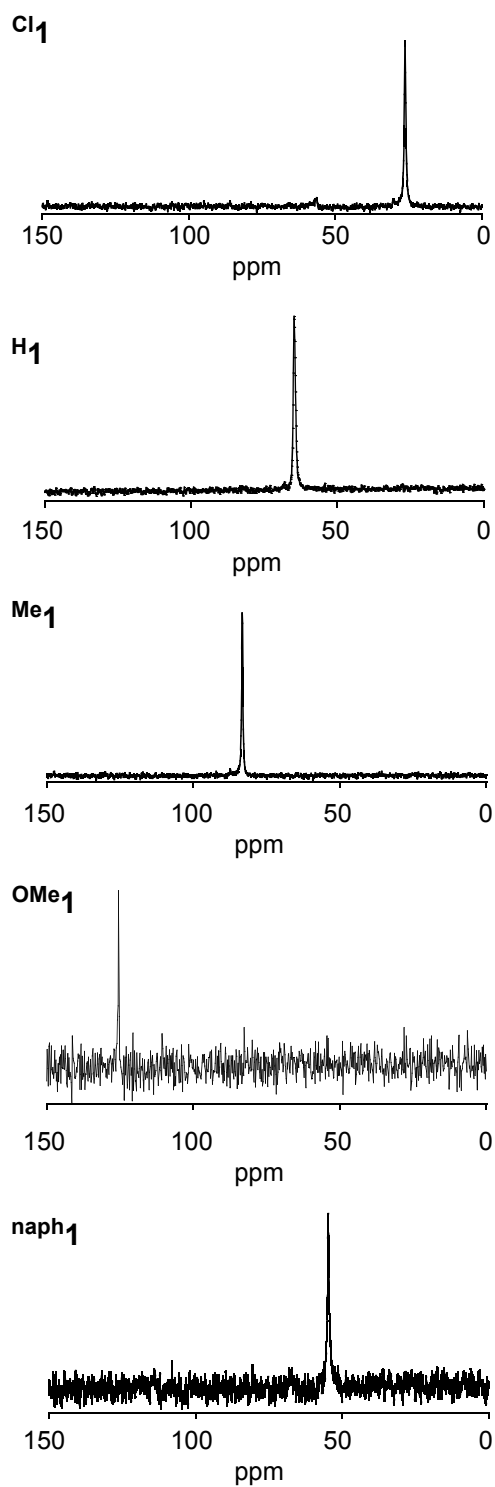

Figure S5.  $^{119}\text{Sn}$ -NMR spectra of **R1** in  $\text{C}_6\text{D}_6$ .

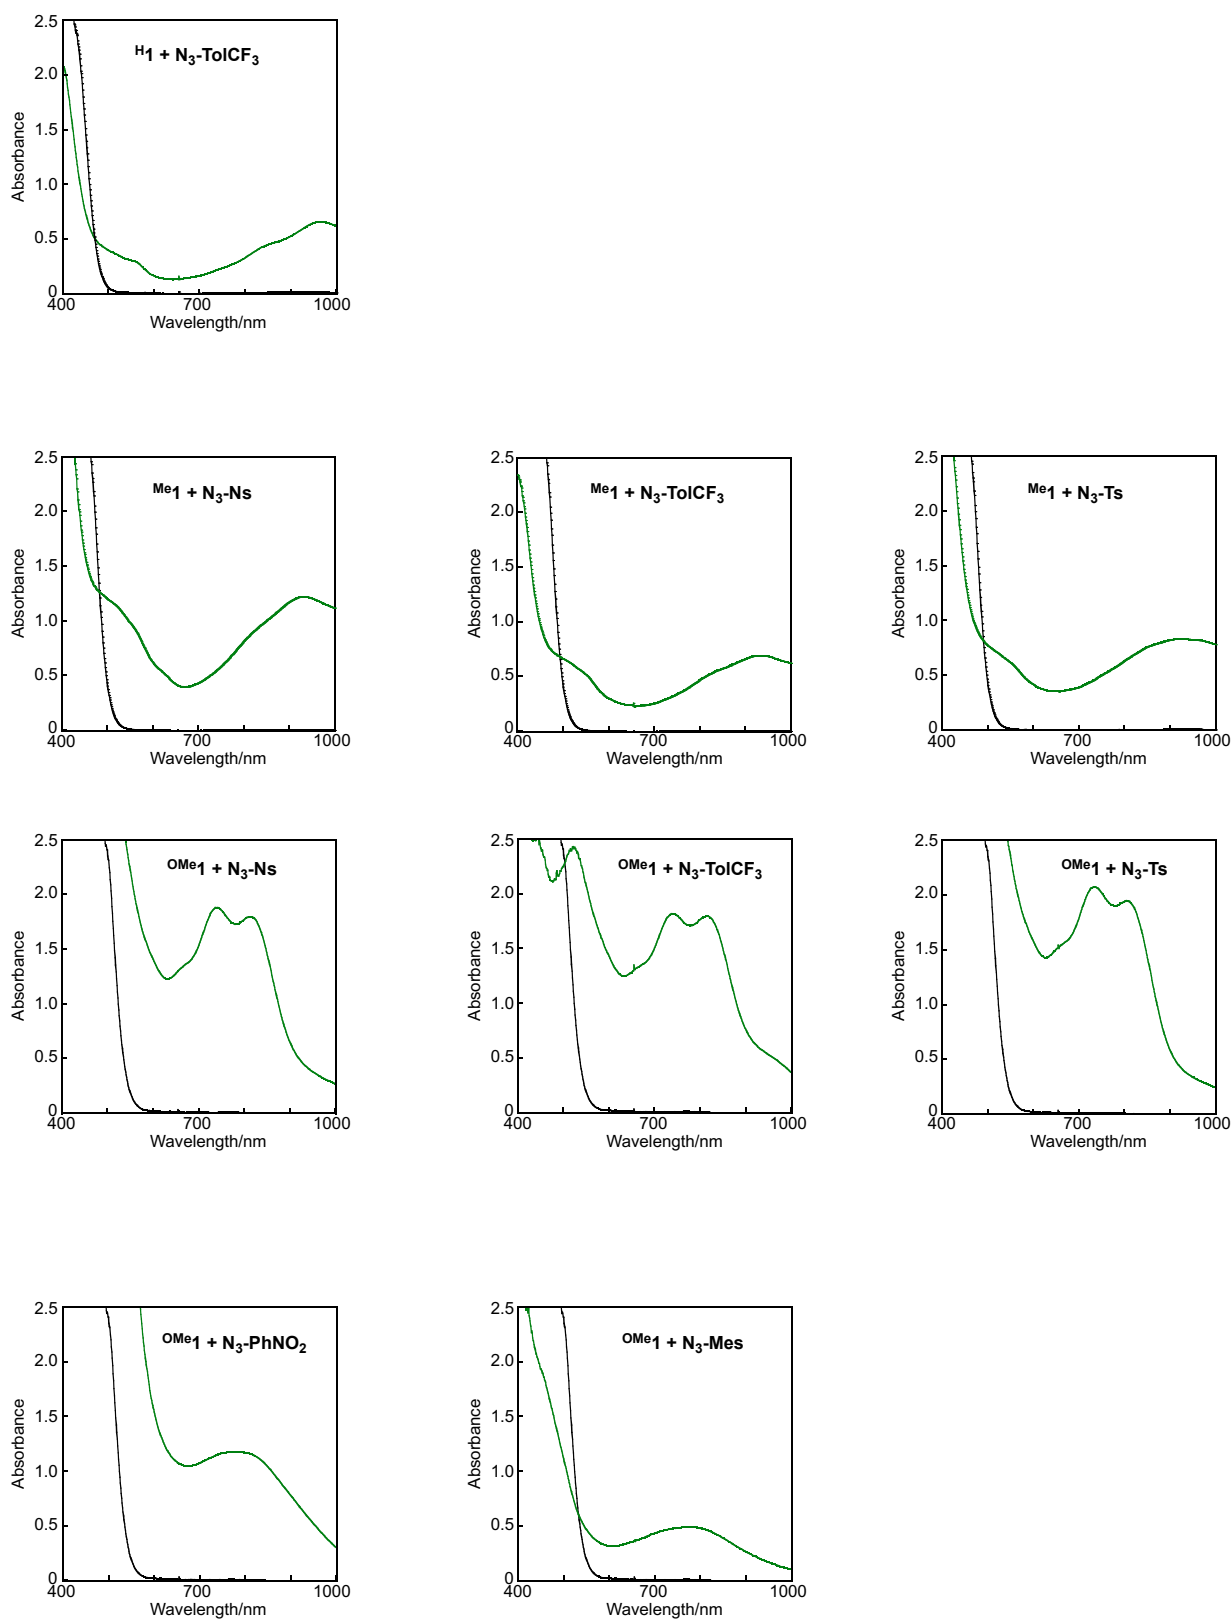

**Figure S6.** Absorption spectral changes of  $R1$  (1.0 mM) by the reactions with one equivalent of  $N_3\text{-R}'$  in toluene at  $-30\text{ }^\circ\text{C}$ .



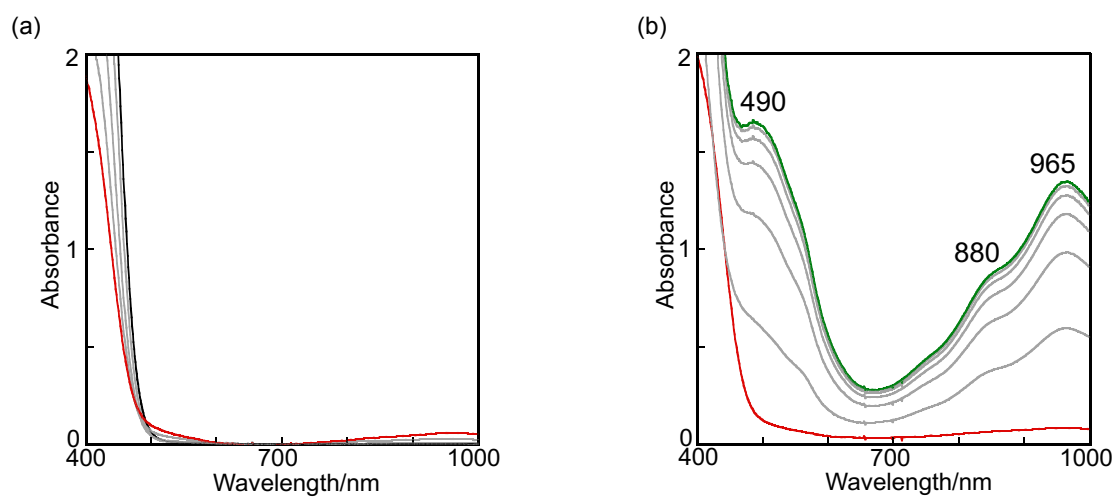

**Figure S7.** Time dependent spectral changes from  $\text{H1}$  (1.0 mM) to  $\text{H1}^{\text{N}_3\text{-TolCF}_3}$  (black to red, a) and those from  $\text{H1}^{\text{N}_3\text{-TolCF}_3}$  to  $\text{H2}^{\text{TolCF}_3\text{-N}^\bullet}$  (red to green, b) in the presence of 20.0 mM of  $\text{N}_3\text{-TolCF}_3$  in toluene at  $-40^\circ\text{C}$ .

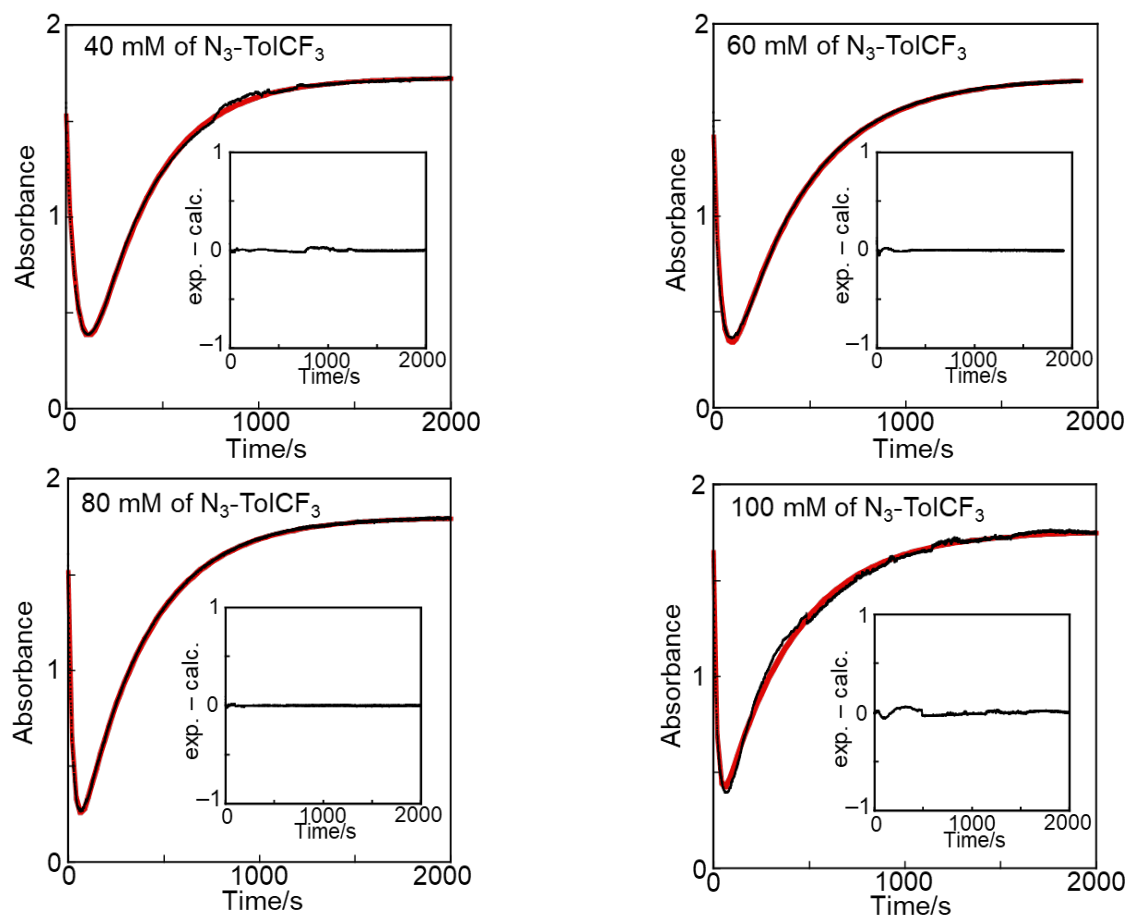

**Figure S8.** Time course plots of the absorbance change at 455 nm in the presence of various amounts of  $N_3\text{-TolCF}_3$ .

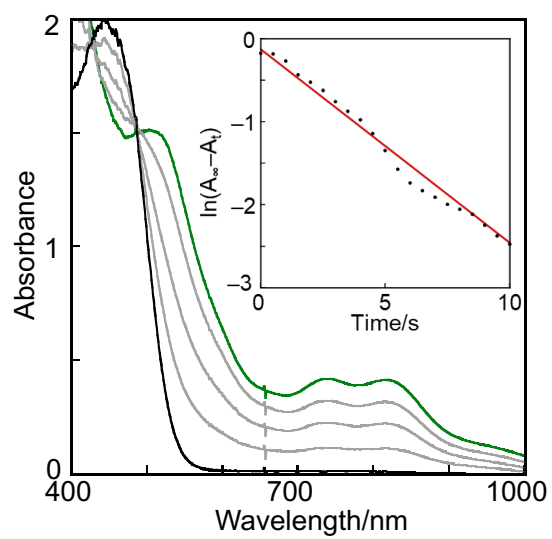

**Figure S9.** Absorption spectral changes of <sup>OMe</sup>**1** upon a treatment with 20 equiv. of N<sub>3</sub>-TolCF<sub>3</sub> in toluene at -40 °C. inset: first-order plot based on absorbance change at 590 nm.

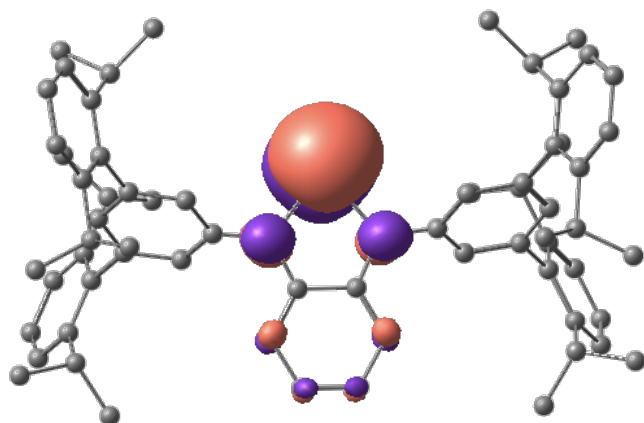

**Figure S10.** LUMO of  $H_1$ .

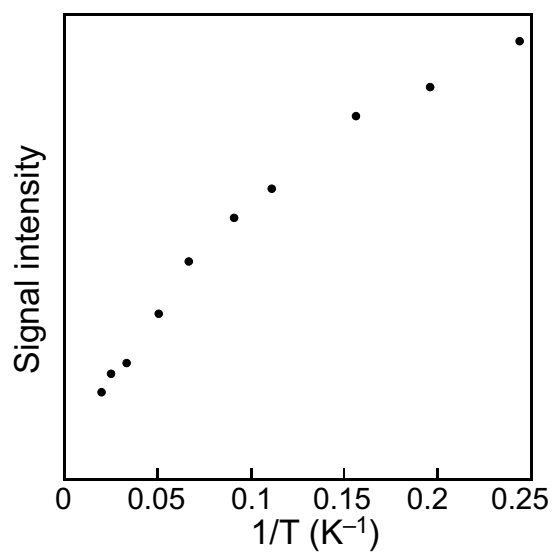

**Figure S11.** Temperature dependence of signal intensity at  $g = 4.002$ .

**Table S1. Crystallographic Data for [Sn(<sup>Cl</sup>L)(THF)<sub>2</sub>]•CH<sub>3</sub>CN (<sup>Cl</sup>1•CH<sub>3</sub>CN) and [Sn(<sup>Me</sup>L)(THF)(CH<sub>3</sub>CN)]•CH<sub>3</sub>CN (<sup>Me</sup>1•CH<sub>3</sub>CN)**

|                                          | <sup>Cl</sup> 1•CH <sub>3</sub> CN                                               | <sup>Me</sup> 1•CH <sub>3</sub> CN                 |
|------------------------------------------|----------------------------------------------------------------------------------|----------------------------------------------------|
| formula                                  | C <sub>76</sub> H <sub>87</sub> Cl <sub>2</sub> N <sub>3</sub> O <sub>2</sub> Sn | C <sub>76</sub> H <sub>96</sub> N <sub>4</sub> OSn |
| formula weight                           | 1264.07                                                                          | 1200.25                                            |
| crystal system                           | monoclinic                                                                       | monoclinic                                         |
| space group                              | <i>P</i> 2 <sub>1</sub> / <i>c</i>                                               | <i>P</i> 2 <sub>1</sub> / <i>c</i>                 |
| <i>a</i> , Å                             | 17.3591(7)                                                                       | 17.0941(9)                                         |
| <i>b</i> , Å                             | 18.5527(9)                                                                       | 18.8683(11)                                        |
| <i>c</i> , Å                             | 22.2644(9)                                                                       | 22.2358(12)                                        |
| <i>α</i> , deg                           | 90                                                                               | 90                                                 |
| <i>β</i> , deg                           | 106.469(7)                                                                       | 106.608(7)                                         |
| <i>γ</i> , deg                           | 90                                                                               | 90                                                 |
| <i>V</i> , Å <sup>3</sup>                | 6875.3(6)                                                                        | 6872.7(7)                                          |
| <i>Z</i>                                 | 4                                                                                | 4                                                  |
| <i>ρ</i> calc, g/cm <sup>3</sup>         | 1.221                                                                            | 1.160                                              |
| <i>μ</i> /cm <sup>-1</sup>               | 4.96                                                                             | 4.16                                               |
| <i>F</i> (000)                           | 2656.0                                                                           | 2552.0                                             |
| Mo <i>Kα</i> , cm <sup>-1</sup>          | 0.71075                                                                          | 0.71075                                            |
| <i>T</i> , K                             | 115                                                                              | 115                                                |
| 2 <i>θ</i> <sub>max</sub> , deg          | 54.952                                                                           | 54.97                                              |
| no. of refins obsd                       | 15717                                                                            | 15678                                              |
| no. of variables                         | 753                                                                              | 759                                                |
| <i>R</i> <sup>a</sup>                    | 0.0450                                                                           | 0.0534                                             |
| w <i>R</i> <sup>b</sup>                  | 0.1116                                                                           | 0.1424                                             |
| GOF                                      | 1.083                                                                            | 1.096                                              |
| max./min. Δ <i>ρ</i> , e Å <sup>-3</sup> | 1.67/ -0.88                                                                      | 1.65/ -1.33                                        |

<sup>a</sup>  $R1 = \Sigma(|F_o| - |F_c|) / \Sigma|F_o|$ . <sup>b</sup>  $wR2 = (\Sigma(w(F_o^2 - F_c^2)^2) / \Sigma w(F_o^2)^2)^{1/2}$ .

**Table S2. Crystallographic Data for [Sn(<sup>OMe</sup>L)(THF)(CH<sub>3</sub>CN)]•CH<sub>3</sub>CN (<sup>OMe</sup>1•CH<sub>3</sub>CN), [Sn(<sup>naph</sup>L)(THF)<sub>2</sub>]•CH<sub>3</sub>CN (<sup>naph</sup>1•CH<sub>3</sub>CN), and [Sn(L<sup>Bu2Ph</sup>)(THF)] (SnL<sup>Bu2Ph</sup>)**

|                                          | <sup>OMe</sup> 1•CH <sub>3</sub> CN                                    | <sup>naph</sup> 1•CH <sub>3</sub> CN                             | SnL <sup>Bu2Ph</sup>                                             |
|------------------------------------------|------------------------------------------------------------------------|------------------------------------------------------------------|------------------------------------------------------------------|
| formula                                  | C <sub>75.42</sub> H <sub>93</sub> N <sub>3.98</sub> O <sub>3</sub> Sn | C <sub>80</sub> H <sub>99</sub> N <sub>3</sub> O <sub>2</sub> Sn | C <sub>38</sub> H <sub>46</sub> N <sub>2</sub> O <sub>2</sub> Sn |
| formula weight                           | 1222.11                                                                | 1253.31                                                          | 665.51                                                           |
| crystal system                           | monoclinic                                                             | monoclinic                                                       | orthorhombic                                                     |
| space group                              | <i>P</i> 2 <sub>1</sub> / <i>c</i>                                     | <i>P</i> 2 <sub>1</sub> / <i>c</i>                               | <i>Pnma</i>                                                      |
| <i>a</i> , Å                             | 16.8998(13)                                                            | 17.3796(8)                                                       | 9.5302(8)                                                        |
| <i>b</i> , Å                             | 18.8654(16)                                                            | 18.5286(10)                                                      | 31.242(2)                                                        |
| <i>c</i> , Å                             | 22.6765(19)                                                            | 22.9413(10)                                                      | 11.5295(10)                                                      |
| <i>α</i> , deg                           | 90                                                                     | 90                                                               | 90                                                               |
| <i>β</i> , deg                           | 109.078(8)                                                             | 101.332(7)                                                       | 90                                                               |
| <i>γ</i> , deg                           | 90                                                                     | 90                                                               | 90                                                               |
| <i>V</i> , Å <sup>3</sup>                | 6832.7(10)                                                             | 7243.5(6)                                                        | 3432.8(5)                                                        |
| <i>Z</i>                                 | 4                                                                      | 4                                                                | 4                                                                |
| <i>ρ</i> calc, g/cm <sup>3</sup>         | 1.188                                                                  | 1.149                                                            | 1.2876                                                           |
| <i>μ</i> /cm <sup>-1</sup>               | 4.22                                                                   | 3.98                                                             | 7.75                                                             |
| <i>F</i> (000)                           | 2590.0                                                                 | 2664.0                                                           | 1382.0                                                           |
| MoKα, cm <sup>-1</sup>                   | 0.71075                                                                | 0.71075                                                          | 0.71075                                                          |
| <i>T</i> , K                             | 115                                                                    | 115                                                              | 158                                                              |
| 2θmax, deg                               | 50.696                                                                 | 54.972                                                           | 54.965                                                           |
| no. of refins obsd                       | 12475                                                                  | 16473                                                            | 30040                                                            |
| no. of variables                         | 763                                                                    | 791                                                              | 204                                                              |
| <i>R</i> <sup>a</sup>                    | 0.0611                                                                 | 0.0640                                                           | 0.0578                                                           |
| w <i>R</i> <sup>b</sup>                  | 0.1252                                                                 | 0.1233                                                           | 0.1315                                                           |
| GOF                                      | 0.933                                                                  | 1.186                                                            | 1.039                                                            |
| max./min. Δ <i>ρ</i> , e Å <sup>-3</sup> | 1.85/ -0.71                                                            | 0.85/ -0.66                                                      | 1.50/-2.53                                                       |

<sup>a</sup>  $R1 = \frac{\sum(|F_o| - |F_c|)}{\sum|F_o|}$ . <sup>b</sup>  $wR2 = \frac{(\sum(w(F_o^2 - F_c^2)^2))}{\sum w(F_o^2)^2}^{1/2}$ .

**Table S3. Combination of R<sup>1</sup> and N<sub>3</sub>-R' that generates tin(II) nitrene radical complex**

|                         | N <sub>3</sub> -Ns                                     | N <sub>3</sub> -TolCF <sub>3</sub>                                    | N <sub>3</sub> -Ts                                     | N <sub>3</sub> -PhNO <sub>2</sub>                               | N <sub>3</sub> -Mes                                |
|-------------------------|--------------------------------------------------------|-----------------------------------------------------------------------|--------------------------------------------------------|-----------------------------------------------------------------|----------------------------------------------------|
|                         | (2131) <sup>a</sup>                                    | (2130) <sup>a</sup>                                                   | (2126) <sup>a</sup>                                    | (2123) <sup>a</sup>                                             | (2121) <sup>a</sup>                                |
| <b>OMe<sub>1</sub></b>  | <b>OMe<sub>2</sub>N•-Ns</b><br>(820, 742) <sup>b</sup> | <b>OMe<sub>2</sub>N•-TolCF<sub>3</sub></b><br>(820, 742) <sup>b</sup> | <b>OMe<sub>2</sub>N•-Ts</b><br>(814, 736) <sup>b</sup> | <b>OMe<sub>2</sub>N•-PhNO<sub>2</sub></b><br>(790) <sup>b</sup> | <b>OMe<sub>2</sub>N•-Mes</b><br>(790) <sup>b</sup> |
| <b>Me<sub>1</sub></b>   | <b>Me<sub>2</sub>N•-Ns</b><br>(934) <sup>b</sup>       | <b>Me<sub>2</sub>N•-TolCF<sub>3</sub></b><br>(946) <sup>b</sup>       | <b>Me<sub>2</sub>N•-Ts</b><br>(928) <sup>b</sup>       | — <sup>c</sup>                                                  | — <sup>c</sup>                                     |
| <b>H<sub>1</sub></b>    | <b>H<sub>2</sub>N•-Ns</b><br>(960) <sup>b</sup>        | <b>H<sub>2</sub>N•-TolCF<sub>3</sub></b><br>(965) <sup>b</sup>        | — <sup>c</sup>                                         | — <sup>c</sup>                                                  | — <sup>c</sup>                                     |
| <b>Cl<sub>1</sub></b>   | — <sup>c</sup>                                         | — <sup>c</sup>                                                        | — <sup>c</sup>                                         | — <sup>c</sup>                                                  | — <sup>c</sup>                                     |
| <b>naph<sub>1</sub></b> | — <sup>c</sup>                                         | — <sup>c</sup>                                                        | — <sup>c</sup>                                         | — <sup>c</sup>                                                  | — <sup>c</sup>                                     |

<sup>a</sup>  $\nu(\text{N}\equiv\text{N})$  stretch ( $\text{cm}^{-1}$ ) of azides. <sup>b</sup>  $\lambda_{\text{max}}$  of near-IR absorption bands of  $\text{R}_2\text{R}'\text{-N}\cdot$ . <sup>c</sup>  $\text{R}_2\text{R}'\text{-N}\cdot$  was not formed.



**Table S4. Optimized structure of <sup>H</sup>1 in the closed shell singlet**

|    |           |           |           |
|----|-----------|-----------|-----------|
| Sn | 0.000034  | 0.940639  | 0.769304  |
| N  | -1.321758 | -0.047116 | -0.543855 |
| N  | 1.321800  | -0.047155 | -0.543833 |
| C  | 4.824253  | -1.201039 | 0.147455  |
| C  | -2.733863 | -0.040265 | -0.360298 |
| C  | -3.424376 | 1.184760  | -0.355194 |
| H  | -2.881959 | 2.101421  | -0.578125 |
| C  | 5.691042  | 3.267441  | 1.122211  |
| C  | -3.445523 | -1.229467 | -0.105044 |
| H  | -2.911286 | -2.176578 | -0.089361 |
| C  | 2.733916  | -0.040312 | -0.360316 |
| C  | 6.368477  | 4.498276  | 1.100454  |
| H  | 6.499662  | 5.056038  | 2.025682  |
| C  | 4.804862  | 1.235802  | -0.093047 |
| C  | 5.571209  | -2.477324 | 0.421763  |
| C  | 0.716789  | -0.803540 | -1.548551 |
| C  | -5.528703 | 2.553887  | -0.091432 |
| C  | -4.804746 | 1.235897  | -0.092682 |
| C  | -5.571236 | -2.477314 | 0.421342  |
| C  | -1.406255 | -1.493842 | -2.570455 |
| H  | -2.491530 | -1.474970 | -2.588155 |
| C  | 3.445524  | -1.229501 | -0.104862 |
| H  | 2.911228  | -2.176576 | -0.088988 |
| C  | 1.406299  | -1.493897 | -2.570415 |
| H  | 2.491576  | -1.475071 | -2.588077 |
| C  | -6.174832 | -3.182221 | -0.650408 |
| C  | 5.528904  | 2.553745  | -0.092043 |
| C  | 5.493486  | 0.037604  | 0.153110  |
| H  | 6.562923  | 0.065994  | 0.351620  |
| C  | 0.703959  | -2.177088 | -3.563851 |
| H  | 1.250894  | -2.700723 | -4.344933 |
| C  | -4.824244 | -1.200985 | 0.147328  |

|   |           |           |           |
|---|-----------|-----------|-----------|
| C | -0.703913 | -2.177056 | -3.563874 |
| H | -1.250845 | -2.700666 | -4.344973 |
| C | -5.660988 | -2.970877 | 1.747271  |
| C | 3.424473  | 1.184684  | -0.355462 |
| H | 2.882074  | 2.101329  | -0.578509 |
| C | -6.354427 | -4.170919 | 1.978639  |
| H | -6.429374 | -4.561688 | 2.991549  |
| C | -0.716750 | -0.803518 | -1.548564 |
| C | 5.150357  | 2.744040  | 2.452128  |
| H | 4.662594  | 1.782944  | 2.263799  |
| C | -5.690240 | 3.267705  | 1.122828  |
| C | 6.859327  | -4.378339 | -0.374748 |
| H | 7.325422  | -4.930354 | -1.188607 |
| C | -6.712062 | 4.310592  | -1.283347 |
| H | -7.110839 | 4.722220  | -2.208468 |
| C | 6.175071  | -3.182328 | -0.649772 |
| C | 5.891268  | 2.339568  | -2.637288 |
| H | 5.358868  | 1.402846  | -2.447880 |
| C | 6.876709  | 5.020598  | -0.092043 |
| H | 7.398585  | 5.975793  | -0.092124 |
| C | 6.041818  | 3.075496  | -1.306542 |
| C | -5.493417 | 0.037686  | 0.153277  |
| H | -6.562842 | 0.066085  | 0.351847  |
| C | -6.042127 | 3.075568  | -1.305747 |
| C | -5.149055 | 2.744345  | 2.452555  |
| H | -4.661223 | 1.783315  | 2.264048  |
| C | -6.950602 | -4.873539 | 0.927974  |
| H | -7.483543 | -5.802125 | 1.124036  |
| C | -5.021064 | -2.246069 | 2.930548  |
| H | -4.569298 | -1.322296 | 2.556802  |
| C | 6.095753  | -2.690010 | -2.094185 |
| H | 5.566064  | -1.732575 | -2.096142 |
| C | 6.711831  | 4.310481  | -1.284339 |
| H | 7.110215  | 4.722166  | -2.209604 |

|   |           |           |           |
|---|-----------|-----------|-----------|
| C | -6.859089 | -4.378298 | -0.375673 |
| H | -7.324970 | -4.930249 | -1.189698 |
| C | -5.892324 | 2.339466  | -2.636475 |
| H | -5.359451 | 1.402965  | -2.447312 |
| C | 6.285113  | 2.487973  | 3.465789  |
| H | 7.025307  | 1.787987  | 3.061498  |
| H | 5.883346  | 2.061533  | 4.393339  |
| H | 6.810205  | 3.415002  | 3.725136  |
| C | -6.095233 | -2.689737 | -2.094754 |
| H | -5.565529 | -1.732310 | -2.096497 |
| C | -6.067061 | -1.844831 | 3.991130  |
| H | -6.854638 | -1.220712 | 3.553501  |
| H | -5.592926 | -1.277329 | 4.801573  |
| H | -6.547447 | -2.723239 | 4.438140  |
| C | 6.950565  | -4.873431 | 0.928975  |
| H | 7.483513  | -5.801966 | 1.125260  |
| C | 5.660681  | -2.970737 | 1.747769  |
| C | -6.876339 | 5.020835  | -0.091042 |
| H | -7.398150 | 5.976066  | -0.090975 |
| C | -3.888970 | -3.086051 | 3.558917  |
| H | -4.270339 | -4.027763 | 3.971575  |
| H | -3.406992 | -2.534200 | 4.375599  |
| H | -3.122519 | -3.335119 | 2.816001  |
| C | 5.020422  | -2.245846 | 2.930814  |
| H | 4.569241  | -1.321824 | 2.556976  |
| C | -6.367588 | 4.498593  | 1.101268  |
| H | -6.498305 | 5.056445  | 2.026507  |
| C | 5.044041  | 3.150172  | -3.640476 |
| H | 4.053940  | 3.377551  | -3.229065 |
| H | 4.904263  | 2.585240  | -4.570345 |
| H | 5.525220  | 4.101667  | -3.896764 |
| C | 4.083317  | 3.689564  | 3.042479  |
| H | 4.504470  | 4.673711  | 3.280092  |
| H | 3.669199  | 3.271954  | 3.968662  |

|   |           |           |           |
|---|-----------|-----------|-----------|
| H | 3.257480  | 3.842991  | 2.338051  |
| C | 7.495396  | -2.435549 | -2.691020 |
| H | 8.061634  | -1.722117 | -2.081282 |
| H | 7.410968  | -2.025905 | -3.705195 |
| H | 8.082213  | -3.359605 | -2.753880 |
| C | 6.354114  | -4.170726 | 1.979427  |
| H | 6.428856  | -4.561372 | 2.992399  |
| C | -5.046195 | 3.150136  | -3.640532 |
| H | -5.528014 | 4.101299  | -3.896854 |
| H | -4.906801 | 2.584930  | -4.570291 |
| H | -4.055918 | 3.378147  | -3.229901 |
| C | 5.285114  | -3.663052 | -2.976265 |
| H | 5.765781  | -4.647049 | -3.033121 |
| H | 5.197854  | -3.274519 | -3.998708 |
| H | 4.274320  | -3.809829 | -2.578296 |
| C | 7.262456  | 1.970572  | -3.240994 |
| H | 7.850625  | 2.863991  | -3.482362 |
| H | 7.131989  | 1.397570  | -4.167404 |
| H | 7.850592  | 1.362574  | -2.543923 |
| C | -6.283471 | 2.488116  | 3.466559  |
| H | -6.808633 | 3.415075  | 3.726008  |
| H | -5.881362 | 2.061781  | 4.394012  |
| H | -7.023667 | 1.787991  | 3.062519  |
| C | -5.284453 | -3.662693 | -2.976796 |
| H | -4.273747 | -3.809564 | -2.578642 |
| H | -5.196973 | -3.274034 | -3.999171 |
| H | -5.765147 | -4.646665 | -3.033878 |
| C | -4.081959 | 3.689977  | 3.042646  |
| H | -3.256372 | 3.843600  | 2.337974  |
| H | -3.667490 | 3.272335  | 3.968657  |
| H | -4.503185 | 4.674038  | 3.280500  |
| C | -7.494761 | -2.435175 | -2.691807 |
| H | -8.081664 | -3.359170 | -2.754704 |
| H | -7.410149 | -2.025585 | -3.705990 |

|   |           |           |           |
|---|-----------|-----------|-----------|
| H | -8.061014 | -1.721650 | -2.082185 |
| C | -7.263889 | 1.969884  | -3.238987 |
| H | -7.851218 | 1.361762  | -2.541345 |
| H | -7.134006 | 1.396816  | -4.165439 |
| H | -7.852571 | 2.863079  | -3.479942 |
| C | 6.065944  | -1.845208 | 3.992088  |
| H | 6.545533  | -2.723876 | 4.439442  |
| H | 5.591571  | -1.277452 | 4.802213  |
| H | 6.854160  | -1.221520 | 3.554996  |
| C | 3.887636  | -3.085494 | 3.558382  |
| H | 3.121492  | -3.334098 | 2.814992  |
| H | 3.405426  | -2.533626 | 4.374917  |
| H | 4.268415  | -4.027446 | 3.971037  |

**Table S5. Optimized structure of  $\text{H}^1\text{N}^3\text{-TolCF}_3$  in the closed shell singlet**

|   |           |           |           |
|---|-----------|-----------|-----------|
| C | -0.076334 | -3.233361 | 0.345130  |
| C | 0.266643  | -3.963381 | -0.799602 |
| C | 1.204049  | -5.002855 | -0.776097 |
| C | 1.823923  | -5.312715 | 0.439986  |
| C | 1.498596  | -4.584829 | 1.592776  |
| C | 0.555121  | -3.547160 | 1.552454  |
| S | -0.548322 | -3.568893 | -2.348805 |
| O | -0.335868 | -4.658668 | -3.312280 |
| C | 2.198487  | -4.889554 | 2.900469  |
| N | 0.399454  | -2.153176 | -2.884934 |
| N | 1.128801  | -2.403638 | -3.873686 |
| N | 1.815089  | -2.539547 | -4.779482 |
| O | -1.872910 | -3.008987 | -2.067129 |
| C | -3.577886 | -0.256644 | -0.662022 |
| C | -4.971721 | -0.152669 | -0.824988 |
| C | -5.704092 | 0.650740  | 0.062911  |
| C | -5.067731 | 1.357329  | 1.100730  |
| C | -3.676603 | 1.256229  | 1.237622  |

|   |           |           |           |
|---|-----------|-----------|-----------|
| C | -2.922275 | 0.448863  | 0.362641  |
| C | -5.671392 | -0.894118 | -1.930827 |
| C | -6.139938 | -2.213318 | -1.709796 |
| C | -6.803442 | -2.880630 | -2.753146 |
| C | -7.001268 | -2.266020 | -3.992358 |
| C | -6.531623 | -0.966761 | -4.202965 |
| C | -5.864413 | -0.263760 | -3.185806 |
| N | -1.496900 | 0.410477  | 0.446036  |
| C | -0.840985 | 0.083874  | 1.634559  |
| C | -1.467476 | -0.448621 | 2.783531  |
| C | -0.724448 | -0.741278 | 3.930161  |
| C | 0.662142  | -0.501450 | 3.952379  |
| C | 1.306305  | 0.000209  | 2.819000  |
| C | 0.580404  | 0.278380  | 1.639386  |
| C | -5.860878 | 2.223029  | 2.040630  |
| C | -6.060900 | 3.593493  | 1.738048  |
| C | -6.794065 | 4.386671  | 2.636878  |
| C | -7.323181 | 3.844554  | 3.811230  |
| C | -7.123971 | 2.491705  | 4.099935  |
| C | -6.397276 | 1.663724  | 3.227835  |
| C | -5.498860 | 4.237502  | 0.471434  |
| C | -4.438798 | 5.307877  | 0.806783  |
| N | 1.125692  | 0.779006  | 0.455941  |
| C | 2.528191  | 0.964400  | 0.291236  |
| C | 3.006849  | 2.220799  | -0.124060 |
| C | 4.373940  | 2.430658  | -0.373294 |
| C | 5.269068  | 1.366823  | -0.178981 |
| C | 4.816723  | 0.103409  | 0.245737  |
| C | 3.445142  | -0.091940 | 0.465555  |
| C | 4.865049  | 3.780088  | -0.819676 |
| C | 4.940477  | 4.079325  | -2.203459 |
| C | 5.395768  | 5.348359  | -2.599127 |
| C | 5.770992  | 6.306794  | -1.653751 |
| C | 5.694196  | 6.002743  | -0.291936 |

|    |           |           |           |
|----|-----------|-----------|-----------|
| C  | 5.243999  | 4.745900  | 0.146640  |
| C  | 5.793242  | -1.020079 | 0.463814  |
| C  | 6.340900  | -1.230597 | 1.754902  |
| C  | 7.254598  | -2.281593 | 1.941070  |
| C  | 7.629117  | -3.109032 | 0.879147  |
| C  | 7.087722  | -2.891886 | -0.390684 |
| C  | 6.167577  | -1.854664 | -0.619069 |
| C  | 5.976300  | -0.350248 | 2.949602  |
| C  | 7.210516  | 0.389275  | 3.507108  |
| C  | 5.606996  | -1.662352 | -2.027255 |
| C  | 4.842523  | -2.911987 | -2.511245 |
| C  | 4.538172  | 3.069861  | -3.277838 |
| C  | 3.322578  | 3.564023  | -4.090073 |
| C  | -5.944563 | -2.934606 | -0.377234 |
| C  | -5.079042 | -4.201640 | -0.542322 |
| C  | -6.198614 | 0.193910  | 3.595528  |
| C  | -7.542557 | -0.544005 | 3.765267  |
| C  | 5.178367  | 4.466353  | 1.647495  |
| C  | 6.574218  | 4.543542  | 2.300582  |
| C  | -5.361644 | 1.150529  | -3.472194 |
| C  | -4.274771 | 1.149614  | -4.567863 |
| Sn | -0.259498 | 1.132924  | -1.101589 |
| C  | -6.615582 | 4.823218  | -0.417315 |
| C  | -5.321487 | 0.045525  | 4.856934  |
| C  | 5.720126  | 2.723206  | -4.206901 |
| C  | 6.714607  | -1.271031 | -3.027931 |
| C  | -7.294643 | -3.264826 | 0.292812  |
| C  | 4.181911  | 5.407217  | 2.356731  |
| C  | 5.268644  | -1.159648 | 4.056528  |
| C  | -6.516062 | 2.106695  | -3.836978 |
| H  | 2.306884  | 3.047278  | -0.230382 |
| H  | 3.081589  | -1.071168 | 0.767105  |
| H  | -6.953499 | 5.440528  | 2.417101  |
| H  | 2.375107  | 0.186017  | 2.843967  |

|   |           |           |           |
|---|-----------|-----------|-----------|
| H | -3.005418 | -0.905699 | -1.321276 |
| H | -2.538597 | -0.625522 | 2.770673  |
| H | -6.782868 | 0.730656  | -0.054379 |
| H | -1.225655 | -1.144014 | 4.807550  |
| H | 1.239500  | -0.706346 | 4.851155  |
| H | -3.167899 | 1.817934  | 2.017580  |
| H | 7.385314  | -3.537712 | -1.214563 |
| H | -4.998696 | 3.457586  | -0.110510 |
| H | -7.167468 | -3.894120 | -2.596414 |
| H | 5.988020  | 6.753176  | 0.439333  |
| H | -5.667294 | -0.291331 | 2.771187  |
| H | -7.888100 | 4.472769  | 4.497493  |
| H | 6.331526  | 1.522369  | -0.354454 |
| H | 4.238803  | 2.144216  | -2.776853 |
| H | 8.339882  | -3.917494 | 1.040044  |
| H | 4.890937  | -0.835448 | -1.996307 |
| H | -5.405665 | -2.260703 | 0.295649  |
| H | -7.538895 | 2.075254  | 5.015745  |
| H | 7.679911  | -2.454962 | 2.927569  |
| H | 4.812414  | 3.444748  | 1.786228  |
| H | -7.352216 | 4.056434  | -0.683145 |
| H | -6.194123 | 5.227611  | -1.346002 |
| H | -7.149005 | 5.637395  | 0.087508  |
| H | 5.273095  | 0.413952  | 2.604851  |
| H | 7.232909  | -0.360551 | -2.706176 |
| H | 6.289335  | -1.088234 | -4.022556 |
| H | 7.465224  | -2.064399 | -3.125824 |
| H | -7.516392 | -2.797476 | -4.790473 |
| H | 6.121571  | 7.285324  | -1.976666 |
| H | 5.503552  | -3.783206 | -2.589927 |
| H | 4.406543  | -2.737421 | -3.502565 |
| H | 4.033160  | -3.170599 | -1.817518 |
| H | -4.899637 | 1.536641  | -2.558575 |
| H | 5.457914  | 5.591144  | -3.658130 |



|   |           |           |           |
|---|-----------|-----------|-----------|
| H | -4.347417 | 0.529882  | 4.721225  |
| H | -5.149555 | -1.014069 | 5.084725  |
| H | -5.799694 | 0.501671  | 5.732062  |
| H | -4.872328 | 6.135731  | 1.380578  |
| H | -4.009876 | 5.727021  | -0.112026 |
| H | -3.622479 | 4.882832  | 1.402187  |
| H | -7.892127 | -2.358885 | 0.448073  |
| H | -7.133522 | -3.738972 | 1.269105  |
| H | -7.888561 | -3.954973 | -0.318314 |
| H | -6.685366 | -0.494401 | -5.171308 |
| H | 4.493492  | 6.455757  | 2.279541  |
| H | 4.110174  | 5.157962  | 3.422593  |
| H | 3.180050  | 5.324271  | 1.920036  |
| H | -5.573776 | -4.944772 | -1.179390 |
| H | -4.896781 | -4.669874 | 0.433399  |
| H | -4.112254 | -3.961008 | -0.997477 |
| H | -8.125038 | -0.137970 | 4.600759  |
| H | -7.372053 | -1.608918 | 3.966119  |
| H | -8.155558 | -0.462117 | 2.860418  |
| H | 6.062835  | 3.600594  | -4.768056 |
| H | 5.424797  | 1.957423  | -4.934903 |
| H | 6.572838  | 2.339294  | -3.635347 |
| H | 4.371596  | -1.658624 | 3.673488  |
| H | 4.970968  | -0.500787 | 4.881946  |
| H | 5.925491  | -1.934165 | 4.470020  |
| H | 2.468485  | 3.774452  | -3.435778 |
| H | 3.014298  | 2.807293  | -4.822242 |
| H | 3.554112  | 4.484297  | -4.639485 |
| H | 7.958117  | -0.311480 | 3.897380  |
| H | 6.919396  | 1.056532  | 4.327825  |
| H | 7.693404  | 0.994246  | 2.731066  |
| H | 7.274118  | 3.849641  | 1.820884  |
| H | 6.514666  | 4.286356  | 3.365369  |
| H | 6.999486  | 5.551373  | 2.224492  |

|   |           |           |           |
|---|-----------|-----------|-----------|
| H | -7.016697 | 1.800172  | -4.763090 |
| H | -6.138752 | 3.126345  | -3.984544 |
| H | -7.271719 | 2.134311  | -3.043491 |
| H | -3.438065 | 0.497274  | -4.292216 |
| H | -3.883597 | 2.162816  | -4.724489 |
| H | -4.671493 | 0.793145  | -5.525995 |
| H | 1.428099  | -5.563935 | -1.678691 |
| H | 2.547675  | -6.120744 | 0.490008  |
| H | 0.304543  | -2.986708 | 2.449294  |
| H | -0.821998 | -2.445016 | 0.303627  |
| F | 3.218196  | -4.025145 | 3.127043  |
| F | 1.357981  | -4.791178 | 3.953689  |
| F | 2.724679  | -6.134294 | 2.916232  |

**Table S6. Optimized structure of TS in the closed shell singlet**

|    |           |           |           |
|----|-----------|-----------|-----------|
| C  | -0.468565 | 5.132837  | 0.061247  |
| C  | -1.180724 | 3.979844  | 0.407989  |
| C  | -2.580262 | 3.962792  | 0.444765  |
| C  | -3.282362 | 5.127131  | 0.118215  |
| C  | -2.578715 | 6.286895  | -0.238728 |
| C  | -1.177288 | 6.295580  | -0.263385 |
| S  | -0.265245 | 2.477655  | 0.834165  |
| O  | 1.095325  | 2.910000  | 1.229768  |
| C  | -3.344845 | 7.552954  | -0.543364 |
| N  | -0.233846 | 1.610650  | -0.609869 |
| N  | 0.624215  | 2.395245  | -1.791467 |
| N  | 1.129293  | 1.693700  | -2.573337 |
| Sn | 0.248107  | -0.506653 | -1.100990 |
| N  | 1.662166  | -0.963113 | 0.497282  |
| C  | 1.167762  | -1.758332 | 1.481934  |
| C  | 1.943046  | -2.331199 | 2.534810  |
| C  | 1.337568  | -3.085671 | 3.521468  |
| C  | -0.066940 | -3.323981 | 3.499211  |

|   |           |           |           |
|---|-----------|-----------|-----------|
| C | -0.853870 | -2.799456 | 2.492657  |
| C | -0.274584 | -1.994482 | 1.465233  |
| N | -0.971740 | -1.387200 | 0.473299  |
| C | -2.380994 | -1.573838 | 0.319543  |
| C | -2.938777 | -2.828928 | 0.018807  |
| C | -4.322442 | -2.956232 | -0.182831 |
| C | -5.133985 | -1.811006 | -0.079483 |
| C | -4.588561 | -0.550262 | 0.216517  |
| C | -3.202770 | -0.440638 | 0.411660  |
| C | -4.922200 | -4.296333 | -0.507639 |
| C | -4.963591 | -4.742216 | -1.852897 |
| C | -5.519865 | -6.002009 | -2.131829 |
| C | -6.029288 | -6.807957 | -1.110109 |
| C | -5.987322 | -6.358547 | 0.212461  |
| C | -5.437853 | -5.106385 | 0.535543  |
| C | -5.451018 | 0.675635  | 0.329682  |
| C | -5.813177 | 1.162046  | 1.612388  |
| C | -6.585283 | 2.333236  | 1.697736  |
| C | -7.001328 | 3.009801  | 0.547346  |
| C | -6.644133 | 2.519389  | -0.711857 |
| C | -5.866851 | 1.355833  | -0.843433 |
| C | -5.394741 | 0.457856  | 2.903063  |
| C | -6.616468 | 0.056768  | 3.755894  |
| C | -5.484774 | 0.879273  | -2.244328 |
| C | -4.616967 | 1.921407  | -2.980668 |
| C | -4.419955 | -3.901684 | -3.007635 |
| C | -3.203311 | -4.579667 | -3.672659 |
| C | -5.408073 | -4.667596 | 1.999054  |
| C | -6.828524 | -4.558841 | 2.591630  |
| C | 3.064175  | -0.734612 | 0.338171  |
| C | 3.524877  | 0.592758  | 0.308064  |
| C | 4.890084  | 0.860244  | 0.105027  |
| C | 5.773998  | -0.217530 | -0.076911 |
| C | 5.325433  | -1.550619 | -0.064238 |

|   |           |           |           |
|---|-----------|-----------|-----------|
| C | 3.961630  | -1.801187 | 0.144063  |
| C | 5.400628  | 2.274118  | 0.092742  |
| C | 5.552453  | 2.977529  | 1.315248  |
| C | 6.042044  | 4.294035  | 1.281144  |
| C | 6.380833  | 4.908282  | 0.072963  |
| C | 6.226993  | 4.207578  | -1.126033 |
| C | 5.734981  | 2.891683  | -1.140084 |
| C | 6.284356  | -2.689987 | -0.271553 |
| C | 6.441697  | -3.252311 | -1.563683 |
| C | 7.332404  | -4.326048 | -1.730895 |
| C | 8.059892  | -4.834856 | -0.651561 |
| C | 7.902578  | -4.270417 | 0.617114  |
| C | 7.019489  | -3.198282 | 0.829214  |
| C | 5.670731  | -2.734042 | -2.777181 |
| C | 4.664335  | -3.785025 | -3.292258 |
| C | 5.219134  | 2.355166  | 2.670999  |
| C | 4.067007  | 3.105938  | 3.372060  |
| C | 6.876136  | -2.626527 | 2.239190  |
| C | 8.208632  | -2.047677 | 2.758869  |
| C | 5.575559  | 2.182720  | -2.485146 |
| C | 4.636827  | 2.953791  | -3.435717 |
| C | 6.614797  | -2.273218 | -3.906735 |
| C | 6.307680  | -3.674585 | 3.219105  |
| C | -5.512765 | -3.581977 | -4.048650 |
| C | -6.729534 | 0.505549  | -3.076237 |
| C | 6.465925  | 2.273671  | 3.576935  |
| C | -4.522340 | -5.601044 | 2.851117  |
| C | -4.403087 | 1.314741  | 3.719135  |
| C | 6.945359  | 1.927099  | -3.149573 |
| O | -1.083525 | 1.692692  | 1.790218  |
| H | -2.292713 | -3.699196 | -0.075487 |
| H | -2.746114 | 0.508945  | 0.672749  |
| H | 7.461549  | -4.768430 | -2.716628 |
| H | -1.926668 | -2.959117 | 2.492205  |

|   |           |           |           |
|---|-----------|-----------|-----------|
| H | 2.825755  | 1.408404  | 0.481019  |
| H | 3.008517  | -2.132899 | 2.571810  |
| H | 6.831736  | -0.016148 | -0.233791 |
| H | 1.938231  | -3.489486 | 4.333266  |
| H | -0.525597 | -3.909830 | 4.292388  |
| H | 3.590728  | -2.823684 | 0.136979  |
| H | -6.970391 | 3.050983  | -1.603498 |
| H | 5.093616  | -1.858838 | -2.463833 |
| H | 6.162301  | 4.844891  | 2.211758  |
| H | -6.385988 | -6.990829 | 1.003355  |
| H | 6.161119  | -1.799392 | 2.198908  |
| H | 8.746855  | -5.666168 | -0.798699 |
| H | -6.206949 | -1.906007 | -0.234205 |
| H | -4.075377 | -2.946730 | -2.599245 |
| H | -7.604026 | 3.912339  | 0.631772  |
| H | -4.880700 | -0.026994 | -2.141428 |
| H | 4.879628  | 1.329205  | 2.501307  |
| H | 8.472772  | -4.670506 | 1.453200  |
| H | -6.868536 | 2.718918  | 2.674848  |
| H | -4.963753 | -3.668656 | 2.044409  |
| H | 7.310860  | -1.504828 | -3.551735 |
| H | 6.036799  | -1.851897 | -4.738435 |
| H | 7.208700  | -3.104835 | -4.303918 |
| H | -4.875908 | -0.466510 | 2.631754  |
| H | -7.331407 | -0.257620 | -2.569228 |
| H | -6.432232 | 0.111212  | -4.055753 |
| H | -7.373837 | 1.375632  | -3.249415 |
| H | 6.761048  | 5.928200  | 0.065507  |
| H | -6.457420 | -7.781006 | -1.343497 |
| H | -5.163212 | 2.858036  | -3.143822 |
| H | -4.311071 | 1.540206  | -3.962817 |
| H | -3.711430 | 2.158182  | -2.410327 |
| H | 5.115036  | 1.206967  | -2.304216 |
| H | -5.557052 | -6.357361 | -3.159679 |

|   |           |           |           |
|---|-----------|-----------|-----------|
| H | 5.343116  | -4.061734 | 2.869404  |
| H | 6.161385  | -3.232546 | 4.212590  |
| H | 6.985434  | -4.529100 | 3.331632  |
| H | 5.175341  | -4.691637 | -3.637994 |
| H | 4.085395  | -3.384755 | -4.133715 |
| H | 3.961659  | -4.080561 | -2.504362 |
| H | 7.272940  | 1.709849  | 3.093857  |
| H | 6.218695  | 1.775779  | 4.522881  |
| H | 6.854628  | 3.269953  | 3.818952  |
| H | 6.487566  | 4.692777  | -2.064455 |
| H | -4.918750 | -6.623110 | 2.870947  |
| H | -4.472027 | -5.243526 | 3.887228  |
| H | -3.501289 | -5.649922 | 2.454490  |
| H | 4.345846  | 4.143040  | 3.595556  |
| H | 3.816865  | 2.617534  | 4.322328  |
| H | 3.165572  | 3.124597  | 2.750817  |
| H | 8.975518  | -2.825327 | 2.855755  |
| H | 8.069696  | -1.591191 | 3.746604  |
| H | 8.597260  | -1.279704 | 2.080400  |
| H | -5.893416 | -4.491540 | -4.528056 |
| H | -5.111470 | -2.934168 | -4.837780 |
| H | -6.362895 | -3.068403 | -3.585183 |
| H | -3.492975 | 1.530851  | 3.148793  |
| H | -4.107158 | 0.788061  | 4.634869  |
| H | -4.853168 | 2.270187  | 4.015333  |
| H | -2.407981 | -4.770610 | -2.942777 |
| H | -2.792982 | -3.943028 | -4.466237 |
| H | -3.477529 | -5.540889 | -4.123463 |
| H | -7.171295 | 0.933965  | 4.109048  |
| H | -6.294057 | -0.506890 | 4.640020  |
| H | -7.311682 | -0.570204 | 3.185323  |
| H | -7.449588 | -3.871146 | 2.006347  |
| H | -6.787004 | -4.187232 | 3.622908  |
| H | -7.334058 | -5.531651 | 2.608347  |

|   |           |          |           |
|---|-----------|----------|-----------|
| H | 7.458229  | 2.868539 | -3.380302 |
| H | 6.820984  | 1.374490 | -4.089165 |
| H | 7.603105  | 1.343740 | -2.494563 |
| H | 3.649956  | 3.102172 | -2.984806 |
| H | 4.499180  | 2.395818 | -4.370108 |
| H | 5.042857  | 3.939000 | -3.694012 |
| H | -3.116925 | 3.063799 | 0.733047  |
| H | -4.368696 | 5.123090 | 0.136041  |
| H | -0.641950 | 7.199622 | -0.539471 |
| H | 0.617219  | 5.118189 | 0.057124  |
| F | -3.637161 | 8.246565 | 0.586695  |
| F | -2.649118 | 8.390484 | -1.345907 |
| F | -4.524652 | 7.296114 | -1.155950 |

**Table S7. Optimized structure of  $\text{H}_2\text{N}_3\text{-ToIcF}_3$  in the closed-shell singlet**

|    |           |           |           |
|----|-----------|-----------|-----------|
| C  | -1.593434 | 4.417769  | 0.400489  |
| C  | -0.718424 | 3.708888  | -0.428715 |
| C  | -0.369157 | 4.199844  | -1.694323 |
| C  | -0.901850 | 5.415410  | -2.132140 |
| C  | -1.780642 | 6.131838  | -1.303356 |
| C  | -2.125656 | 5.637378  | -0.039165 |
| S  | 0.016357  | 2.159103  | 0.179073  |
| O  | 1.428434  | 2.512144  | 0.536000  |
| C  | -2.315191 | 7.463823  | -1.764684 |
| N  | -0.103869 | 1.180789  | -1.068225 |
| Sn | 0.184880  | -0.777440 | -1.306941 |
| N  | 1.595226  | -0.934916 | 0.677385  |
| C  | 1.011810  | -0.896716 | 1.846011  |
| C  | 1.704570  | -0.759605 | 3.118028  |
| C  | 1.005905  | -0.748658 | 4.285096  |
| C  | -0.441009 | -0.881180 | 4.306414  |
| C  | -1.156465 | -1.031336 | 3.160343  |
| C  | -0.486069 | -1.062088 | 1.868938  |

|   |           |           |           |
|---|-----------|-----------|-----------|
| N | -1.077085 | -1.288675 | 0.727674  |
| C | -2.487955 | -1.363649 | 0.588910  |
| C | -3.034199 | -2.508352 | -0.018243 |
| C | -4.418809 | -2.603921 | -0.222302 |
| C | -5.233133 | -1.521062 | 0.155930  |
| C | -4.693873 | -0.352943 | 0.724397  |
| C | -3.309224 | -0.276694 | 0.943696  |
| C | -5.015504 | -3.837660 | -0.840111 |
| C | -5.048720 | -3.972262 | -2.251302 |
| C | -5.607140 | -5.136194 | -2.806339 |
| C | -6.126332 | -6.146722 | -1.992789 |
| C | -6.091488 | -6.003532 | -0.603079 |
| C | -5.538949 | -4.857960 | -0.006177 |
| C | -5.585913 | 0.801580  | 1.088400  |
| C | -6.015382 | 0.963027  | 2.429949  |
| C | -6.843055 | 2.052032  | 2.750041  |
| C | -7.246640 | 2.962587  | 1.769719  |
| C | -6.821797 | 2.792374  | 0.449562  |
| C | -5.988992 | 1.720420  | 0.086660  |
| C | -5.604182 | -0.002979 | 3.540718  |
| C | -6.824828 | -0.629481 | 4.245688  |
| C | -5.553020 | 1.584882  | -1.371636 |
| C | -4.790639 | 2.831607  | -1.864423 |
| C | -4.500219 | -2.896736 | -3.188364 |
| C | -3.285950 | -3.412859 | -3.989169 |
| C | -5.520370 | -4.754975 | 1.518450  |
| C | -6.949246 | -4.710834 | 2.099738  |
| C | 2.996546  | -0.782831 | 0.493648  |
| C | 3.678705  | 0.374498  | 0.911323  |
| C | 5.054082  | 0.497791  | 0.659033  |
| C | 5.725138  | -0.541833 | -0.009261 |
| C | 5.048283  | -1.691995 | -0.453318 |
| C | 3.670513  | -1.796881 | -0.211703 |
| C | 5.794180  | 1.731520  | 1.096762  |



|   |           |           |           |
|---|-----------|-----------|-----------|
| C | 6.392622  | 1.770937  | 2.381122  |
| C | 7.069313  | 2.936160  | 2.777842  |
| C | 7.155990  | 4.041943  | 1.927529  |
| C | 6.562899  | 3.992336  | 0.663484  |
| C | 5.876759  | 2.846651  | 0.226182  |
| C | 5.779304  | -2.785896 | -1.180928 |
| C | 5.880023  | -2.743649 | -2.594552 |
| C | 6.563187  | -3.778945 | -3.254913 |
| C | 7.137179  | -4.834734 | -2.541765 |
| C | 7.034407  | -4.866297 | -1.148352 |
| C | 6.360120  | -3.851719 | -0.448390 |
| C | 5.272272  | -1.612443 | -3.422840 |
| C | 4.171423  | -2.132855 | -4.370863 |
| C | 6.306436  | 0.597086  | 3.356091  |
| C | 5.436894  | 0.953833  | 4.580931  |
| C | 6.274910  | -3.935128 | 1.075071  |
| C | 7.673098  | -3.900433 | 1.726629  |
| C | 5.244638  | 2.849035  | -1.164757 |
| C | 4.116129  | 3.896437  | -1.271379 |
| C | 6.353205  | -0.835753 | -4.203332 |
| C | 5.481804  | -5.178265 | 1.530232  |
| C | -5.591479 | -2.349100 | -4.131473 |
| C | -6.757303 | 1.273257  | -2.285834 |
| C | 7.699638  | 0.099607  | 3.792530  |
| C | -4.697214 | -5.893353 | 2.156683  |
| C | -4.667602 | 0.682796  | 4.558545  |
| C | 6.306560  | 3.051999  | -2.266177 |
| O | -0.812667 | 1.768489  | 1.375170  |
| H | -2.380289 | -3.328799 | -0.305058 |
| H | -2.843577 | 0.626709  | 1.331532  |
| H | 6.648196  | -3.759669 | -4.339560 |
| H | -2.232892 | -1.155320 | 3.184305  |
| H | 3.116829  | 1.193859  | 1.352022  |
| H | 2.785608  | -0.680966 | 3.111600  |

|   |           |           |           |
|---|-----------|-----------|-----------|
| H | 6.791676  | -0.446296 | -0.202688 |
| H | 1.535693  | -0.655494 | 5.230723  |
| H | -0.951329 | -0.878594 | 5.267072  |
| H | 3.123429  | -2.675929 | -0.545094 |
| H | -7.137359 | 3.506379  | -0.308281 |
| H | 4.799452  | -0.903879 | -2.736259 |
| H | 7.531190  | 2.982347  | 3.762143  |
| H | -6.497527 | -6.794173 | 0.024766  |
| H | 5.730658  | -3.055653 | 1.432572  |
| H | 7.662883  | -5.628551 | -3.069136 |
| H | -6.306850 | -1.583283 | -0.009270 |
| H | -4.152514 | -2.057961 | -2.577717 |
| H | -7.888455 | 3.801090  | 2.033514  |
| H | -4.862661 | 0.739032  | -1.443284 |
| H | 5.816694  | -0.235557 | 2.841120  |
| H | 7.484778  | -5.690639 | -0.598969 |
| H | -7.178242 | 2.189943  | 3.776076  |
| H | -5.032410 | -3.813651 | 1.788864  |
| H | 7.118461  | -0.435912 | -3.528295 |
| H | 5.904148  | 0.005704  | -4.744885 |
| H | 6.857055  | -1.474787 | -4.938245 |
| H | -5.044215 | -0.824884 | 3.083022  |
| H | -7.278543 | 0.364296  | -1.962754 |
| H | -6.426211 | 1.127736  | -3.321449 |
| H | -7.485240 | 2.093375  | -2.279806 |
| H | 7.681036  | 4.939193  | 2.249986  |
| H | -6.556664 | -7.041056 | -2.439534 |
| H | -5.426240 | 3.725014  | -1.856385 |
| H | -4.442540 | 2.681903  | -2.893621 |
| H | -3.915626 | 3.035881  | -1.238526 |
| H | 4.788016  | 1.868708  | -1.332680 |
| H | -5.639138 | -5.253393 | -3.887646 |
| H | 4.473768  | -5.184354 | 1.099502  |
| H | 5.386948  | -5.195907 | 2.623125  |

|   |           |           |           |
|---|-----------|-----------|-----------|
| H | 5.979166  | -6.106241 | 1.224115  |
| H | 4.575696  | -2.836266 | -5.108567 |
| H | 3.712615  | -1.301079 | -4.919336 |
| H | 3.381417  | -2.651373 | -3.815114 |
| H | 8.309196  | -0.179307 | 2.925369  |
| H | 7.607585  | -0.779739 | 4.442336  |
| H | 8.247411  | 0.867661  | 4.350835  |
| H | 6.630668  | 4.858272  | 0.008318  |
| H | -5.140867 | -6.875111 | 1.953340  |
| H | -4.650383 | -5.769332 | 3.245761  |
| H | -3.671710 | -5.905533 | 1.769620  |
| H | 5.881481  | 1.772217  | 5.159453  |
| H | 5.335418  | 0.089161  | 5.249778  |
| H | 4.435080  | 1.277198  | 4.273947  |
| H | 8.275129  | -4.769252 | 1.435383  |
| H | 7.587747  | -3.906132 | 2.820380  |
| H | 8.224183  | -2.999879 | 1.432391  |
| H | -5.972994 | -3.127094 | -4.803239 |
| H | -5.187631 | -1.541338 | -4.754039 |
| H | -6.440798 | -1.950345 | -3.565287 |
| H | -3.775606 | 1.088667  | 4.067553  |
| H | -4.346344 | -0.029438 | 5.330008  |
| H | -5.172323 | 1.514196  | 5.064714  |
| H | -2.489606 | -3.762957 | -3.322091 |
| H | -2.875049 | -2.615887 | -4.620973 |
| H | -3.563118 | -4.248474 | -4.642905 |
| H | -7.425692 | 0.126242  | 4.764782  |
| H | -6.500258 | -1.363983 | 4.993423  |
| H | -7.477920 | -1.138886 | 3.527839  |
| H | -7.522955 | -3.878339 | 1.676494  |
| H | -6.918407 | -4.585193 | 3.189178  |
| H | -7.498118 | -5.635568 | 1.885667  |
| H | 6.784572  | 4.035873  | -2.189185 |
| H | 5.843357  | 2.986277  | -3.258441 |

|   |           |          |           |
|---|-----------|----------|-----------|
| H | 7.095726  | 2.292797 | -2.206566 |
| H | 3.316010  | 3.691000 | -0.553048 |
| H | 3.679630  | 3.877817 | -2.278400 |
| H | 4.495406  | 4.910150 | -1.092794 |
| H | 0.296482  | 3.622163 | -2.329567 |
| H | -0.646007 | 5.800546 | -3.115861 |
| H | -2.813127 | 6.191740 | 0.593976  |
| H | -1.854461 | 4.008553 | 1.372032  |
| F | -3.492259 | 7.779295 | -1.172828 |
| F | -1.457918 | 8.481639 | -1.485789 |
| F | -2.521961 | 7.495469 | -3.104422 |

Table S8. Optimized structure of  $\text{H}_2\text{N}_3\text{-ToICF}_3$  in the open-shell singlet

|    |           |           |           |
|----|-----------|-----------|-----------|
| C  | -0.293093 | 4.571986  | 0.617057  |
| C  | 0.326515  | 3.885176  | -0.433766 |
| C  | 0.475808  | 4.465055  | -1.699172 |
| C  | -0.015806 | 5.756690  | -1.919143 |
| C  | -0.647008 | 6.448597  | -0.875824 |
| C  | -0.781388 | 5.863586  | 0.391469  |
| S  | 0.940650  | 2.205738  | -0.152749 |
| O  | 2.028029  | 1.982829  | -1.145865 |
| C  | -1.132569 | 7.861156  | -1.101946 |
| N  | -0.319801 | 1.219484  | -0.465484 |
| Sn | -0.000564 | -0.818668 | -1.163325 |
| N  | 1.364069  | -1.486977 | 0.453995  |
| C  | 0.772585  | -2.088287 | 1.514091  |
| C  | 1.478300  | -2.709752 | 2.590535  |
| C  | 0.796504  | -3.344152 | 3.610341  |
| C  | -0.626902 | -3.406891 | 3.601387  |
| C  | -1.350967 | -2.831139 | 2.574603  |
| C  | -0.691411 | -2.147573 | 1.507894  |
| N  | -1.320475 | -1.590796 | 0.442135  |
| C  | -2.728079 | -1.442757 | 0.357179  |

|   |           |           |           |
|---|-----------|-----------|-----------|
| C | -3.389291 | -1.854897 | -0.815014 |
| C | -4.770536 | -1.656585 | -0.969728 |
| C | -5.487040 | -1.037395 | 0.067974  |
| C | -4.845187 | -0.610712 | 1.245164  |
| C | -3.464299 | -0.812777 | 1.380467  |
| C | -5.466614 | -2.105381 | -2.224573 |
| C | -5.621949 | -1.198660 | -3.303347 |
| C | -6.274322 | -1.638074 | -4.467712 |
| C | -6.762736 | -2.943247 | -4.572188 |
| C | -6.604056 | -3.829846 | -3.503613 |
| C | -5.959899 | -3.431037 | -2.320262 |
| C | -5.622857 | 0.064720  | 2.340767  |
| C | -6.276101 | -0.719211 | 3.324965  |
| C | -6.993654 | -0.068711 | 4.342765  |
| C | -7.068870 | 1.325923  | 4.393137  |
| C | -6.422138 | 2.089951  | 3.418099  |
| C | -5.694054 | 1.479891  | 2.382576  |
| C | -6.212824 | -2.246073 | 3.324348  |
| C | -7.615333 | -2.878975 | 3.213167  |
| C | -5.003934 | 2.362150  | 1.343392  |
| C | -3.899406 | 3.228374  | 1.984298  |
| C | -5.105621 | 0.238229  | -3.241520 |
| C | -4.045900 | 0.510436  | -4.329486 |
| C | -5.813732 | -4.439460 | -1.181371 |
| C | -7.186196 | -4.919476 | -0.665128 |
| C | 2.769266  | -1.286204 | 0.359594  |
| C | 3.469985  | -0.564100 | 1.343477  |
| C | 4.842903  | -0.318511 | 1.197486  |
| C | 5.501587  | -0.783403 | 0.044839  |
| C | 4.813860  | -1.486043 | -0.958256 |
| C | 3.444323  | -1.740151 | -0.786825 |
| C | 5.599113  | 0.441345  | 2.251938  |
| C | 6.118279  | -0.249324 | 3.376063  |
| C | 6.828231  | 0.474397  | 4.348703  |

|   |           |           |           |
|---|-----------|-----------|-----------|
| C | 7.030520  | 1.850741  | 4.215797  |
| C | 6.517530  | 2.521773  | 3.102553  |
| C | 5.794745  | 1.838403  | 2.109791  |
| C | 5.521508  | -1.948015 | -2.200827 |
| C | 5.457723  | -1.153756 | -3.374233 |
| C | 6.119286  | -1.602865 | -4.529847 |
| C | 6.832757  | -2.804634 | -4.532977 |
| C | 6.891948  | -3.578326 | -3.370571 |
| C | 6.241501  | -3.169056 | -2.194226 |
| C | 4.696551  | 0.170877  | -3.422819 |
| C | 3.497960  | 0.096695  | -4.391924 |
| C | 5.931337  | -1.754379 | 3.566343  |
| C | 5.047879  | -2.060946 | 4.794393  |
| C | 6.330244  | -4.055169 | -0.952494 |
| C | 7.782192  | -4.171192 | -0.442871 |
| C | 5.265147  | 2.618274  | 0.907198  |
| C | 4.382625  | 3.809802  | 1.329342  |
| C | 5.623620  | 1.349868  | -3.783628 |
| C | 5.717564  | -5.449205 | -1.201457 |
| C | -6.260764 | 1.257909  | -3.326776 |
| C | -6.016010 | 3.235721  | 0.573452  |
| C | 7.281414  | -2.495209 | 3.657780  |
| C | -4.928560 | -5.634328 | -1.594240 |
| C | -5.461667 | -2.777876 | 4.563415  |
| C | 6.425270  | 3.082578  | 0.000294  |
| O | 1.241019  | 2.098283  | 1.298747  |
| H | -2.827123 | -2.354009 | -1.601961 |
| H | -2.949914 | -0.453967 | 2.268253  |
| H | 6.078867  | -1.004399 | -5.437784 |
| H | -2.432563 | -2.910014 | 2.557585  |
| H | 2.931856  | -0.158306 | 2.195664  |
| H | 2.562430  | -2.690021 | 2.584915  |
| H | 6.563974  | -0.583441 | -0.078002 |
| H | 1.351778  | -3.816241 | 4.417582  |

|   |           |           |           |
|---|-----------|-----------|-----------|
| H | -1.148103 | -3.929269 | 4.400452  |
| H | 2.903267  | -2.303543 | -1.544596 |
| H | -6.484932 | 3.175372  | 3.462864  |
| H | 4.290699  | 0.375921  | -2.428632 |
| H | 7.230329  | -0.042757 | 5.217789  |
| H | -6.987188 | -4.844592 | -3.591359 |
| H | 5.745037  | -3.583100 | -0.157597 |
| H | 7.340816  | -3.136361 | -5.436680 |
| H | -6.557594 | -0.878793 | -0.043235 |
| H | -4.617839 | 0.383403  | -2.273031 |
| H | -7.628425 | 1.814723  | 5.188501  |
| H | -4.516676 | 1.710938  | 0.611849  |
| H | 5.411635  | -2.144472 | 2.685674  |
| H | 7.449072  | -4.513164 | -3.379642 |
| H | -7.498478 | -0.657814 | 5.105899  |
| H | -5.312476 | -3.938829 | -0.347416 |
| H | 6.459848  | 1.425164  | -3.079275 |
| H | 5.065770  | 2.293469  | -3.750301 |
| H | 6.042920  | 1.243900  | -4.791504 |
| H | -5.647077 | -2.561433 | 2.442311  |
| H | -6.781623 | 2.620009  | 0.087347  |
| H | -5.504684 | 3.819519  | -0.201693 |
| H | -6.528263 | 3.941961  | 1.237623  |
| H | 7.585069  | 2.397627  | 4.976246  |
| H | -7.264798 | -3.267804 | -5.481716 |
| H | -4.314959 | 3.927855  | 2.719862  |
| H | -3.380828 | 3.814226  | 1.215911  |
| H | -3.156450 | 2.605895  | 2.496089  |
| H | 4.632367  | 1.952388  | 0.313985  |
| H | -6.401235 | -0.952677 | -5.303323 |
| H | 4.675089  | -5.369894 | -1.530807 |
| H | 5.740742  | -6.048526 | -0.282774 |
| H | 6.269086  | -6.000720 | -1.972115 |
| H | 3.824449  | -0.074422 | -5.425073 |

|   |           |           |           |
|---|-----------|-----------|-----------|
| H | 2.930420  | 1.034537  | -4.365851 |
| H | 2.817606  | -0.718922 | -4.119222 |
| H | 7.896754  | -2.305117 | 2.770958  |
| H | 7.120836  | -3.577821 | 3.736418  |
| H | 7.856830  | -2.180666 | 4.536375  |
| H | 6.678242  | 3.593417  | 3.005892  |
| H | -5.377754 | -6.200644 | -2.418749 |
| H | -4.793129 | -6.322910 | -0.751016 |
| H | -3.938104 | -5.298661 | -1.922600 |
| H | 5.516792  | -1.709303 | 5.721077  |
| H | 4.884582  | -3.141942 | 4.893160  |
| H | 4.071046  | -1.570057 | 4.712309  |
| H | 8.429354  | -4.657589 | -1.182498 |
| H | 7.821120  | -4.766031 | 0.478195  |
| H | 8.206031  | -3.183257 | -0.229065 |
| H | -6.787053 | 1.189680  | -4.286364 |
| H | -5.877965 | 2.281007  | -3.227277 |
| H | -6.995967 | 1.090238  | -2.531261 |
| H | -4.451179 | -2.356445 | 4.624700  |
| H | -5.377403 | -3.871224 | 4.523810  |
| H | -5.984477 | -2.517273 | 5.491305  |
| H | -3.209004 | -0.193605 | -4.252898 |
| H | -3.646567 | 1.527029  | -4.229054 |
| H | -4.468290 | 0.416046  | -5.336964 |
| H | -8.238669 | -2.634521 | 4.081323  |
| H | -7.540118 | -3.971886 | 3.154898  |
| H | -8.138785 | -2.525049 | 2.317609  |
| H | -7.803071 | -4.074838 | -0.337397 |
| H | -7.059360 | -5.600174 | 0.185872  |
| H | -7.743362 | -5.457786 | -1.440943 |
| H | 7.090611  | 3.777214  | 0.527839  |
| H | 6.035525  | 3.596459  | -0.886874 |
| H | 7.031086  | 2.233199  | -0.336881 |
| H | 3.532841  | 3.473332  | 1.932032  |



|   |           |          |           |
|---|-----------|----------|-----------|
| H | 3.985791  | 4.314086 | 0.439941  |
| H | 4.946499  | 4.551417 | 1.907960  |
| H | 0.981030  | 3.918059 | -2.489894 |
| H | 0.088363  | 6.220407 | -2.896245 |
| H | -1.267040 | 6.409685 | 1.195543  |
| H | -0.376217 | 4.106525 | 1.594947  |
| F | -2.196555 | 8.162991 | -0.322059 |
| F | -0.169576 | 8.774847 | -0.818868 |
| F | -1.502502 | 8.071162 | -2.386692 |

Table S9. Optimized structure of  $\text{H}_2\text{ToICF}_3\text{-N}^*$  in the triplet state

|    |           |           |           |
|----|-----------|-----------|-----------|
| C  | -0.316243 | 4.556127  | 0.478780  |
| C  | 0.314215  | 3.857900  | -0.557796 |
| C  | 0.471793  | 4.421047  | -1.829798 |
| C  | -0.022372 | 5.707919  | -2.070831 |
| C  | -0.663822 | 6.411534  | -1.041700 |
| C  | -0.806564 | 5.843053  | 0.232164  |
| S  | 0.935723  | 2.186514  | -0.248666 |
| O  | 2.028874  | 1.956252  | -1.232800 |
| C  | -1.151981 | 7.819497  | -1.290572 |
| N  | -0.321604 | 1.191712  | -0.564212 |
| Sn | 0.008808  | -0.894604 | -1.144888 |
| N  | 1.370473  | -1.435696 | 0.524055  |
| C  | 0.773695  | -1.926258 | 1.638436  |
| C  | 1.474675  | -2.442360 | 2.771721  |
| C  | 0.789404  | -2.974605 | 3.846496  |
| C  | -0.633504 | -3.031698 | 3.841281  |
| C  | -1.353214 | -2.553102 | 2.762517  |
| C  | -0.689582 | -1.980317 | 1.635230  |
| N  | -1.316254 | -1.529717 | 0.517498  |
| C  | -2.724265 | -1.395729 | 0.414917  |
| C  | -3.377418 | -1.922957 | -0.715101 |
| C  | -4.760377 | -1.756643 | -0.890597 |

|   |           |           |           |
|---|-----------|-----------|-----------|
| C | -5.487488 | -1.053460 | 0.084291  |
| C | -4.854248 | -0.511140 | 1.217834  |
| C | -3.470943 | -0.680470 | 1.372546  |
| C | -5.447665 | -2.329090 | -2.099175 |
| C | -5.612395 | -1.528618 | -3.257727 |
| C | -6.257617 | -2.082199 | -4.376473 |
| C | -6.730210 | -3.397240 | -4.359330 |
| C | -6.562256 | -4.178664 | -3.212946 |
| C | -5.924500 | -3.663891 | -2.071609 |
| C | -5.645971 | 0.246438  | 2.247883  |
| C | -6.266777 | -0.455907 | 3.311592  |
| C | -6.998605 | 0.269510  | 4.266611  |
| C | -7.119966 | 1.658994  | 4.178315  |
| C | -6.505307 | 2.342222  | 3.125670  |
| C | -5.763855 | 1.655493  | 2.149265  |
| C | -6.153450 | -1.972449 | 3.462073  |
| C | -7.535336 | -2.657781 | 3.441038  |
| C | -5.105427 | 2.451490  | 1.023636  |
| C | -4.017843 | 3.400002  | 1.569921  |
| C | -5.114493 | -0.085721 | -3.329169 |
| C | -4.058545 | 0.099208  | -4.438883 |
| C | -5.768987 | -4.560340 | -0.843760 |
| C | -7.137661 | -4.995971 | -0.280138 |
| C | 2.775187  | -1.244030 | 0.414626  |
| C | 3.482546  | -0.456959 | 1.342787  |
| C | 4.856641  | -0.231471 | 1.178148  |
| C | 5.510659  | -0.780238 | 0.060164  |
| C | 4.816390  | -1.547198 | -0.890068 |
| C | 3.446086  | -1.781082 | -0.698364 |
| C | 5.619904  | 0.595023  | 2.176058  |
| C | 6.153008  | -0.023094 | 3.335356  |
| C | 6.870465  | 0.761562  | 4.253735  |
| C | 7.066053  | 2.127752  | 4.034055  |
| C | 6.538330  | 2.727193  | 2.887383  |

|   |           |           |           |
|---|-----------|-----------|-----------|
| C | 5.808116  | 1.981271  | 1.946406  |
| C | 5.518533  | -2.097811 | -2.099300 |
| C | 5.467857  | -1.378964 | -3.320982 |
| C | 6.125672  | -1.909190 | -4.443902 |
| C | 6.822084  | -3.118620 | -4.368935 |
| C | 6.867401  | -3.818243 | -3.159931 |
| C | 6.220744  | -3.326120 | -2.013607 |
| C | 4.723838  | -0.050610 | -3.456114 |
| C | 3.529427  | -0.170153 | -4.425914 |
| C | 5.970237  | -1.513260 | 3.622077  |
| C | 5.096141  | -1.741241 | 4.873779  |
| C | 6.293412  | -4.133790 | -0.718464 |
| C | 7.742885  | -4.245005 | -0.200843 |
| C | 5.261106  | 2.684076  | 0.704879  |
| C | 4.367251  | 3.887220  | 1.066073  |
| C | 5.667872  | 1.092083  | -3.883619 |
| C | 5.654654  | -5.528917 | -0.880802 |
| C | -6.282946 | 0.906649  | -3.506175 |
| C | -6.144301 | 3.224341  | 0.184944  |
| C | 7.321807  | -2.245644 | 3.750741  |
| C | -4.879230 | -5.784586 | -1.145552 |
| C | -5.365951 | -2.352716 | 4.734021  |
| C | 6.408325  | 3.108961  | -0.236865 |
| O | 1.225028  | 2.095946  | 1.205857  |
| H | -2.807154 | -2.487152 | -1.450569 |
| H | -2.963507 | -0.234309 | 2.223949  |
| H | 6.095528  | -1.368910 | -5.388024 |
| H | -2.434916 | -2.629849 | 2.751453  |
| H | 2.948216  | 0.013259  | 2.163419  |
| H | 2.558821  | -2.429637 | 2.766161  |
| H | 6.574019  | -0.595911 | -0.077952 |
| H | 1.342259  | -3.370880 | 4.695121  |
| H | -1.158621 | -3.473524 | 4.685138  |
| H | 2.900977  | -2.394372 | -1.413302 |

|   |           |           |           |
|---|-----------|-----------|-----------|
| H | -6.603657 | 3.424097  | 3.062749  |
| H | 4.315832  | 0.220150  | -2.478589 |
| H | 7.283328  | 0.300448  | 5.148929  |
| H | -6.932916 | -5.201788 | -3.206007 |
| H | 5.717179  | -3.602014 | 0.044676  |
| H | 7.327357  | -3.513860 | -5.248325 |
| H | -6.559883 | -0.920691 | -0.042063 |
| H | -4.628675 | 0.153945  | -2.378646 |
| H | -7.690337 | 2.206470  | 4.926367  |
| H | -4.608044 | 1.745504  | 0.352083  |
| H | 5.444435  | -1.959211 | 2.772118  |
| H | 7.410676  | -4.759811 | -3.108362 |
| H | -7.478622 | -0.256462 | 5.089498  |
| H | -5.267671 | -3.981264 | -0.062315 |
| H | 6.501108  | 1.200578  | -3.180061 |
| H | 5.122312  | 2.042999  | -3.912931 |
| H | 6.091374  | 0.918022  | -4.880189 |
| H | -5.591327 | -2.356722 | 2.605407  |
| H | -6.899129 | 2.547873  | -0.232379 |
| H | -5.653427 | 3.743216  | -0.647493 |
| H | -6.667521 | 3.978974  | 0.784107  |
| H | 7.626512  | 2.722280  | 4.753303  |
| H | -7.227104 | -3.810971 | -5.234870 |
| H | -4.445980 | 4.155333  | 2.240157  |
| H | -3.517400 | 3.923209  | 0.746435  |
| H | -3.257602 | 2.845241  | 2.131857  |
| H | 4.632009  | 1.978058  | 0.155893  |
| H | -6.391524 | -1.479045 | -5.272245 |
| H | 4.613605  | -5.450693 | -1.214874 |
| H | 5.667287  | -6.070639 | 0.073171  |
| H | 6.195272  | -6.137033 | -1.615814 |
| H | 3.859274  | -0.409547 | -5.444288 |
| H | 2.973717  | 0.774445  | -4.462671 |
| H | 2.837324  | -0.958709 | -4.107088 |

|   |           |           |           |
|---|-----------|-----------|-----------|
| H | 7.930440  | -2.112194 | 2.849077  |
| H | 7.163152  | -3.321128 | 3.899546  |
| H | 7.903265  | -1.875195 | 4.603170  |
| H | 6.693426  | 3.791449  | 2.723135  |
| H | -5.328375 | -6.428849 | -1.910759 |
| H | -4.737047 | -6.389514 | -0.241483 |
| H | -3.891729 | -5.476770 | -1.508270 |
| H | 5.572500  | -1.332515 | 5.772859  |
| H | 4.932762  | -2.813681 | 5.041363  |
| H | 4.119166  | -1.254977 | 4.768552  |
| H | 8.380763  | -4.789668 | -0.907181 |
| H | 7.770314  | -4.780937 | 0.756090  |
| H | 8.185528  | -3.253792 | -0.049422 |
| H | -6.808117 | 0.743777  | -4.454908 |
| H | -5.913875 | 1.939596  | -3.501238 |
| H | -7.015930 | 0.802799  | -2.697836 |
| H | -4.368772 | -1.896561 | 4.733619  |
| H | -5.247178 | -3.441383 | 4.803506  |
| H | -5.882514 | -2.015112 | 5.640355  |
| H | -3.212156 | -0.583358 | -4.298770 |
| H | -3.673087 | 1.126085  | -4.433281 |
| H | -4.479511 | -0.093349 | -5.432880 |
| H | -8.152820 | -2.349099 | 4.292762  |
| H | -7.423823 | -3.748068 | 3.489361  |
| H | -8.084690 | -2.411569 | 2.525148  |
| H | -7.757139 | -4.127057 | -0.029892 |
| H | -7.005234 | -5.594323 | 0.629839  |
| H | -7.694877 | -5.605897 | -1.000994 |
| H | 7.069625  | 3.840482  | 0.243809  |
| H | 6.005490  | 3.566236  | -1.148833 |
| H | 7.021393  | 2.248424  | -0.529769 |
| H | 3.527790  | 3.575697  | 1.696322  |
| H | 3.955967  | 4.334510  | 0.153128  |
| H | 4.926759  | 4.667407  | 1.596192  |

|          |                  |                 |                  |
|----------|------------------|-----------------|------------------|
| <b>H</b> | <b>0.985505</b>  | <b>3.865376</b> | <b>-2.608894</b> |
| <b>H</b> | <b>0.087852</b>  | <b>6.158858</b> | <b>-3.053222</b> |
| <b>H</b> | <b>-1.300878</b> | <b>6.397857</b> | <b>1.024893</b>  |
| <b>H</b> | <b>-0.406739</b> | <b>4.103250</b> | <b>1.461872</b>  |
| <b>F</b> | <b>-2.222080</b> | <b>8.128794</b> | <b>-0.522198</b> |
| <b>F</b> | <b>-0.193435</b> | <b>8.739598</b> | <b>-1.013582</b> |
| <b>F</b> | <b>-1.513673</b> | <b>8.010530</b> | <b>-2.580564</b> |
